# Supplementary material for: Identification of novel sRNAs involved in biofilm formation, motility, and fimbriae formation in Escherichia coli
Source: PubMed Central journal article supplement (PMC4606813; doi:10.1038/srep15287), 2015-10-15
Supplement: srep15287-s1.pdf [file srep15287-s1.pdf]

## Supplementary Information

### Identification of novel sRNAs involved in biofilm formation, motility, and fimbriae formation in *Escherichia coli*

Geunu Bak<sup>1,3</sup>, Jungmin Lee<sup>1,3</sup>, Shinae Suk<sup>1</sup>, Daun Kim<sup>1</sup>, Ji Young Lee<sup>1</sup>, Kwang-sun Kim<sup>2</sup>, Byong-Seok Choi<sup>1</sup>, and Younghoon Lee<sup>1,\*</sup>

<sup>1</sup>*Department of Chemistry, KAIST, Daejeon 305-701, Korea*

<sup>2</sup>*Superbacteria Research Center, KRIBB, Daejeon 305-806, Korea*

<sup>3</sup>These authors contributed equally to this work.

\*Corresponding author.

Tel: 82-42-350-2832

Fax: 82-42-350-2810

E-mail: [Younghoon.Lee@kaist.ac.kr](mailto:Younghoon.Lee@kaist.ac.kr)

**Supplementary Table 1. *E. coli* sRNAs used for construction of sRNA-overexpressing plasmids**

| Name           | Length (nt) | Characterized function                                                                                                                                                                                               | Hfq interaction | Biogenesis |        |                            | Ref        |
|----------------|-------------|----------------------------------------------------------------------------------------------------------------------------------------------------------------------------------------------------------------------|-----------------|------------|--------|----------------------------|------------|
|                |             |                                                                                                                                                                                                                      |                 | 5'-end     | 3'-end | Rho-independent terminator |            |
| 1 ArcZ         | 120         | Activation of RpoS, repression of <i>arcB</i> , <i>flhDC</i>                                                                                                                                                         | Yes             | Yes        | Yes    | Yes                        | 1-5        |
| 2 C0067        | ~125        | Unknown                                                                                                                                                                                                              | ND <sup>c</sup> | ND         | ND     | ND                         | 6          |
| 3 C0293        | ~73         | Unknown                                                                                                                                                                                                              | ND              | ND         | ND     | ND                         | 6          |
| 4 C0299        | ~79         | Unknown                                                                                                                                                                                                              | ND              | ND         | ND     | ND                         | 6          |
| 5 C0343        | ~75         | Unknown                                                                                                                                                                                                              | ND              | ND         | ND     | ND                         | 6          |
| 6 C0362        | ~386        | Unknown                                                                                                                                                                                                              | ND              | ND         | ND     | ND                         | 6          |
| 7 C0465        | ~78         | Unknown                                                                                                                                                                                                              | ND              | ND         | ND     | ND                         | 6          |
| 8 C0614        | ~87         | Unknown                                                                                                                                                                                                              | ND              | ND         | ND     | ND                         | 6          |
| 9 C0664        | ~113        | Unknown                                                                                                                                                                                                              | ND              | ND         | ND     | ND                         | 6          |
| 10 C0719       | ~222        | Unknown                                                                                                                                                                                                              | ND              | ND         | ND     | ND                         | 6          |
| 11 CsrB        | 369         | Antagonizing CsrA regulation                                                                                                                                                                                         | No              | Yes        | Yes    | Yes                        | 1,2,7,8    |
| 12 CsrC        | 245         | Antagonizing CsrA regulation                                                                                                                                                                                         | No              | Yes        | Yes    | Yes                        | 1,2,7,9    |
| 13 CyaR        | 87          | Induced by low glucose conditions, repression of <i>ompX</i> , <i>yqaE</i> , <i>nadE</i> , <i>luxS</i>                                                                                                               | Yes             | Yes        | Yes    | Yes                        | 2,10,11    |
| 14 DicF        | 53          | Inhibition of cell division, Interference with <i>ftsZ</i> translation                                                                                                                                               | Yes             | Yes        | Yes    | ND                         | 12-14      |
| 15 DsrA        | 87          | Activation of RpoS, repression of <i>hns</i>                                                                                                                                                                         | Yes             | Yes        | Yes    | Yes                        | 15-18      |
| 16 EyeA (I001) | ~75         | Unknown                                                                                                                                                                                                              | ND              | ND         | ND     | ND                         | 19         |
| 17 Ffs         | 114         | 4.5S RNA of Signal recognition particle (SRP)                                                                                                                                                                        | No              | Yes        | Yes    | ND                         | 20,21      |
| 18 FnrS        | 119         | Induced by anaerobic conditions, repression of <i>sodB</i> , <i>maeA</i> , <i>gpmA</i> , <i>folE</i> , <i>folX</i>                                                                                                   | Yes             | Yes        | Yes    | Yes                        | 22,23      |
| 19 GadY        | 105         | Antisense regulator of <i>gadXW</i> , repression of <i>gadW</i> , positive regulation of <i>gadX</i>                                                                                                                 | Yes             | Yes        | Yes    | Yes                        | 24-26      |
| 20 GcvB        | 205         | Induced by high glycine, regulation of genes involved in amino acid metabolism ( <i>oppA</i> , <i>dppA</i> , <i>gltI</i> , <i>livK</i> , <i>livJ</i> , <i>argT</i> , <i>cycA</i> , <i>sstT</i> ), repression of CsgD | Yes             | Yes        | Yes    | Yes                        | 27-32      |
| 21 GlmY        | 184         | Decoy sRNAs for GlmZ                                                                                                                                                                                                 | No              | Yes        | Yes    | Yes                        | 7,33-36    |
| 22 GlmZ        | 207         | Increasing synthesis of <i>glmUS</i> , Stabilization of <i>glmS</i>                                                                                                                                                  | Yes             | Yes        | Yes    | Yes                        | 1,2,34-37  |
| 23 IS118       | ~190        | Unknown                                                                                                                                                                                                              | Yes             | ND         | ND     | ND                         | 24,38,39   |
| 24 IS128       | ~209        | Unknown                                                                                                                                                                                                              | ND              | ND         | ND     | ND                         | 24         |
| 25 McaS        | 94          | Motility and biofilm regulator                                                                                                                                                                                       | Yes             | Yes        | Yes    | Yes                        | 24,32,40   |
| 26 IsrB        | ~160        | Unknown, containing <i>azuC</i> ORF                                                                                                                                                                                  | No              | ND         | ND     | ND                         | 24,41      |
| 27 IsrC        | ~204        | Unknown                                                                                                                                                                                                              | ND              | ND         | ND     | ND                         | 24         |
| 28 IstR-1      | 75          | <i>tisB</i> regulator                                                                                                                                                                                                | ND              | Yes        | Yes    | Yes                        | 42,43      |
| 29 IstR-2      | 140         | SOS-regulated, mitigating IstR-1<br>Induced by low Mg <sup>2+</sup> , PhoP,                                                                                                                                          | ND              | Yes        | Yes    | Yes                        | 42,43      |
| 30 MgrR        | 99          | Regulator of LPS modification gene<br><i>eptB</i> , <i>ygdQ</i>                                                                                                                                                      | Yes             | Yes        | Yes    | Yes                        | 38,44      |
| 31 MicA        | 72          | Repression of <i>ompA</i> , <i>ompX</i> , <i>phoPQ</i>                                                                                                                                                               | Yes             | Yes        | Yes    | Yes                        | 1,10,45-47 |
| 32 MicC        | 109         | Repression of <i>ompC</i>                                                                                                                                                                                            | Yes             | Yes        | Yes    | Yes                        | 24,48      |
| 33 MicF        | 93          | Repression of <i>ompF</i> , <i>Irp</i> antibiotics resistance                                                                                                                                                        | Yes             | Yes        | Yes    | Yes                        | 49-52      |
| 34 MicM        | 85          | Repression of <i>chiP</i> , <i>dpiBA</i> by chbBCARFG decoy mRNA                                                                                                                                                     | Yes             | Yes        | Yes    | Yes                        | 2,53-56    |
| 35 OhsC        | 77          | Regulator of <i>shoB</i> toxin                                                                                                                                                                                       | ND              | Yes        | Yes    | ND                         | 2,57,58    |

|    |      |         |                                                                                                                                                                                       |                   |     |     |     |           |
|----|------|---------|---------------------------------------------------------------------------------------------------------------------------------------------------------------------------------------|-------------------|-----|-----|-----|-----------|
| 36 | OmrA | 88      | Repression of outer membrane proteins ( <i>cirA</i> , <i>fecA</i> , <i>fepA</i> , <i>ompT</i> , <i>gntP</i> , <i>ompR</i> ), repression of <i>csgD</i> , <i>flhDC</i>                 | Yes               | Yes | Yes | Yes | 1,2,59–62 |
| 37 | OmrB | 82      | Repression of outer membrane proteins ( <i>cirA</i> , <i>fecA</i> , <i>fepA</i> , <i>ompT</i> , <i>gntP</i> , <i>ompR</i> ), repression of <i>csgD</i> , <i>flhDC</i>                 | Yes               | Yes | Yes | Yes | 1,2,59–62 |
| 38 | OxyS | 110     | Induced by oxidative stress, Repression of <i>fhIA</i> , <i>yobF-cspC</i> , <i>ybaYwrbA</i> , <i>rpoS</i>                                                                             | Yes               | Yes | Yes | Yes | 63,64     |
| 39 | PsrD | 149~168 | Unknown                                                                                                                                                                               | Yes? <sup>a</sup> | Yes | Yes | Yes | 1         |
| 40 | PsrO | 146~174 | Unknown                                                                                                                                                                               | ND                | Yes | Yes | ND  | 1         |
| 41 | RdlA | 67      | Antisense regulator of <i>ldr</i> toxin                                                                                                                                               | ND                | Yes | Yes | ND  | 57        |
| 42 | RdlB | 66      | Antisense regulator of <i>ldr</i> toxin                                                                                                                                               | ND                | Yes | Yes | ND  | 57        |
| 43 | RdlC | 68      | Antisense regulator of <i>ldr</i> toxin                                                                                                                                               | ND                | Yes | Yes | ND  | 57        |
| 44 | RdlD | 66      | Antisense regulator of <i>ldr</i> toxin                                                                                                                                               | ND                | Yes | Yes | ND  | 57,65     |
| 45 | RnpB | 377     | RNase P RNA                                                                                                                                                                           | No                | Yes | Yes | Yes | 66–68     |
| 46 | RprA | 105     | Activation of RpoS, repression of <i>csgD</i> , <i>ydaM</i>                                                                                                                           | Yes               | Yes | Yes | Yes | 32,69–71  |
| 47 | RseX | 91      | Repression of <i>ompC</i> , <i>ompA</i>                                                                                                                                               | Yes               | Yes | Yes | Yes | 24,72     |
| 48 | RttR | 171     | Processed from <i>tyrT</i> transcript                                                                                                                                                 | ND                | Yes | Yes | ND  | 73        |
| 49 | RybA | 202     | <i>mntS</i> mRNA, Regulator of aromatic amino acid synthesis under oxidative stress                                                                                                   | No                | Yes | Yes | ND  | 2,74,75   |
| 50 | RybB | 81      | Repression of <i>ompC</i> , <i>ompW</i>                                                                                                                                               | Yes               | Yes | Yes | ND  | 2,76,77   |
| 51 | RybD | ~103    | Unknown                                                                                                                                                                               | Yes               | ND  | ND  | Yes | 38        |
| 52 | RydB | ~68     | Unknown                                                                                                                                                                               | No                | ND  | ND  | ND  | 2,7       |
| 53 | RydC | 64      | Repression of ABC permease <i>yejABEF</i>                                                                                                                                             | Yes               | Yes | Yes | ND  | 38,78     |
| 54 | RyeA | ~249    | Unknown                                                                                                                                                                               | No                | Yes | Yes | ND  | 1,2       |
| 55 | SdsR | 104     | RpoS-dependent sRNA                                                                                                                                                                   | Yes               | Yes | Yes | Yes | 2,79      |
| 56 | RyeF | ~388    | Unknown                                                                                                                                                                               | Yes               | ND  | ND  | ND  | 38        |
| 57 | RyfA | ~304    | Unknown                                                                                                                                                                               | ND                | ND  | ND  | ND  | 2,7       |
| 58 | RyfB | 280     | Unknown, <i>shoB</i> mRNA                                                                                                                                                             | ND                | Yes | Yes | ND  | 57        |
| 59 | RyfD | 143     | Unknown                                                                                                                                                                               | ND                | Yes | Yes | ND  | 57        |
| 60 | RyhB | 90      | Induced by iron limitation, repression of iron-containing proteins ( <i>sdhCDAB</i> , <i>acnA</i> , <i>fumA</i> , <i>bfr</i> , <i>sodB</i> ), repression of <i>cysE</i> , <i>shiA</i> | Yes               | Yes | Yes | Yes | 1,2,80–83 |
| 61 | RyjA | 140     | Unknown                                                                                                                                                                               | No                | Yes | Yes | Yes | 1,2       |
| 62 | RyjB | 90      | Unknown                                                                                                                                                                               | Yes               | Yes | Yes | ND  | 38,57     |
| 63 | SgrS | 227     | Repression of <i>ptsG</i> , <i>manXYZ</i> , containing <i>sgrT</i> ORF                                                                                                                | Yes               | Yes | Yes | Yes | 84–86     |
| 64 | SibA | 144     | Antisense regulator of toxin <i>ibs</i>                                                                                                                                               | ND                | Yes | Yes | ND  | 2,58      |
| 65 | SibB | 130     | Antisense regulator of toxin <i>ibs</i>                                                                                                                                               | ND                | Yes | Yes | ND  | 2,58      |
| 66 | SibC | 141     | Antisense regulator of toxin <i>ibs</i>                                                                                                                                               | ND                | Yes | Yes | ND  | 2,58      |
| 67 | SibD | 145     | Antisense regulator of toxin <i>ibs</i>                                                                                                                                               | ND                | Yes | Yes | ND  | 2,58      |
| 68 | SibE | 144     | Antisense regulator of toxin <i>ibs</i>                                                                                                                                               | ND                | Yes | Yes | ND  | 58        |
| 69 | SokA | 30      | Pseudogene, antisense sRNA blocking mok/hok translation; the last 30/52 nt remain                                                                                                     | ND                | Yes | Yes | ND  | 87        |
| 70 | SokB | 56      | antisense sRNA blocking mok/hok translation                                                                                                                                           | ND                | Yes | Yes | ND  | 57,87     |
| 71 | SokC | 55      | antisense sRNA blocking mok/hok translation                                                                                                                                           | ND                | Yes | Yes | ND  | 57,87     |
| 72 | SokE | 59      | antisense sRNA blocking mok/hok translation, missed start codon of <i>mokE</i>                                                                                                        | ND                | Yes | Yes | ND  | 57,87     |

|    |        |      |                                                                 |                   |     |     |     |       |
|----|--------|------|-----------------------------------------------------------------|-------------------|-----|-----|-----|-------|
| 73 | SokX   | 56   | Unknown, No hok toxic peptide                                   | ND                | Yes | Yes | ND  | 57,87 |
| 74 | Spf    | 109  | Repression of <i>galK</i> , broad role in catabolite repression | Yes               | Yes | Yes | Yes | 88-90 |
| 75 | SraA   | ~120 | Unknown                                                         | ND                | ND  | ND  | ND  | 1     |
| 76 | SroA   | 93   | Unknown, leader region of <i>thiBPQ</i>                         | ND                | Yes | Yes | ND  | 91    |
| 77 | SroC   | 163  | Unknown, leader region of <i>gltJKL</i>                         | Yes? <sup>b</sup> | Yes | Yes | Yes | 91    |
| 78 | SroD   | 86   | Unknown, processed from <i>fadD</i>                             | ND                | Yes | Yes | Yes | 91    |
| 79 | SroE   | 92   | Unknown, processed from <i>gcpE</i>                             | ND                | Yes | Yes | ND  | 91    |
| 80 | SroG   | 149  | Unknown, leader region of <i>ribB</i>                           | Yes? <sup>a</sup> | Yes | Yes | ND  | 91    |
| 81 | SroH   | 161  | Unknown, mutant is sensitive to envelope stress                 | ND                | Yes | Yes | ND  | 91,92 |
| 82 | SsrA   | 363  | tmRNA                                                           | No                | Yes | Yes | ND  | 93    |
| 83 | SsrS   | 183  | 6S RNA, inhibition of $\sigma^{70}$ RNA polymerase              | No                | Yes | Yes | ND  | 94    |
| 84 | SymR   | 77   | Antisense regulator of <i>symE</i>                              | ND                | Yes | Yes | ND  | 57,95 |
| 85 | T44    | ~136 | Unknown, leader region of <i>rpsB</i>                           | ND                | Yes | ND  | ND  | 7     |
| 86 | Tp2    | ~120 | Unknown                                                         | ND                | ND  | ND  | ND  | 7     |
| 87 | Tpke11 | ~88  | Unknown                                                         | ND                | ND  | ND  | ND  | 7     |
| 88 | Tpke70 | ~435 | Unknown                                                         | ND                | ND  | ND  | ND  | 7     |
| 89 | pRNA   | 20   | Unknown, synthesis from 6S RNA                                  | ND                | Yes | Yes | ND  | 96    |
| 90 | Och1   | 255  | Unknown                                                         | Yes               | Yes | Yes | ND  | 97    |
| 91 | Och2   | 188  | Unknown                                                         | ND                | Yes | Yes | Yes | 97    |
| 92 | Och3   | 192  | Unknown                                                         | ND                | Yes | Yes | Yes | 97    |
| 93 | Och4   | 241  | Unknown                                                         | ND                | Yes | Yes | ND  | 97    |
| 94 | Och5   | 158  | Unknown                                                         | ND                | Yes | Yes | Yes | 97    |
| 95 | Och6   | 106  | Unknown                                                         | Yes               | Yes | Yes | ND  | 97    |
| 96 | Och7   | 158  | Unknown                                                         | Yes               | Yes | Yes | ND  | 97    |
| 97 | Och8   | 144  | Unknown                                                         | ND                | Yes | Yes | Yes | 97    |
| 98 | Och9   | 72   | Unknown                                                         | Yes               | Yes | Yes | ND  | 97    |
| 99 | Och10  | 106  | Unknown                                                         | Yes               | Yes | Yes | ND  | 97    |

<sup>a,b</sup>Hfq interaction cited from other studies on *Klebsiella pneumoniae*<sup>a,98</sup> and *Salmonella enterica* serovar *Typhimurium*<sup>b,99</sup>.

<sup>c</sup>ND; Not determined.

**Supplementary Table 2. Full sequences of cloned regions of each sRNA**

| sRNA  | Vector  | Preparation    | Enzyme sites      | Cloned sequence                                                                                                                                                                                                                                                                                                                                                                                                                                                        |
|-------|---------|----------------|-------------------|------------------------------------------------------------------------------------------------------------------------------------------------------------------------------------------------------------------------------------------------------------------------------------------------------------------------------------------------------------------------------------------------------------------------------------------------------------------------|
| ArcZ  | pHM-tac | PCR            | <i>EcoRI/XbaI</i> | GTGCGGCCTGAAAAACAGTGTGTGCCCTTGTAACTCATCATAATAATTTACGGCGCAGCCAAGATTTCCTGGTGTGGCGCAGTATTCGCGCACCCCG<br>GTCTAGCCGGGGTCATTTTTTAgtagcttttgcacccacgcttcc                                                                                                                                                                                                                                                                                                                     |
| C0067 | pHMB1   | PCR            | <i>EcoRI/XbaI</i> | ataagagtagctgtattgTTATGCTGTGGCGAAATTTGACTACCTTCGTTTTTTGATTAAAGAATGATTTATTATCGTAAGTAAAATTACATGAATATTTAAAAAGGAAAA<br>CGCATGAAACCGAAGCACAGAATCAACATTCccaatcataaaatatttccgtggagcattttatttgaatagaggttaactc                                                                                                                                                                                                                                                                  |
| C0293 | pHMB1   | Gene synthesis | <i>EcoRI/XbaI</i> | agccggttttgcataactactCACCCGGGACTCGCCAGGGGACAGCCAACAGGCATTGGGTGCAATCACCTTAGCGTTAGGTACATGCGGAAtgtaaaaaaggccg<br>agcggcgcccttcacatacatcttagtactgaga                                                                                                                                                                                                                                                                                                                       |
| C0299 | pHMB1   | Gene synthesis | <i>EcoRI/XbaI</i> | atgagcgtcgtccagaagGCCACGTGAGCACAAGATAAGAGAACGAAAAATCAGCAGCCTATGCAGCGACAAATATTGATAGCCTGAATCAGTATTGatctgctggca<br>agaacagactactgtatataaaaacagta                                                                                                                                                                                                                                                                                                                          |
| C0343 | pHMB1   | Gene synthesis | <i>EcoRI/XbaI</i> | atgaaccgattctggcgtactCTGTTCCAGTGCCCGATCCGATCCCTCGCCGCAACCCATGCCTGACCCACCACCCGATGAAGAACCGATTAAATgtcgcacgtgagc<br>gtagactcggagatagcgcctg                                                                                                                                                                                                                                                                                                                                 |
| C0362 | pHMB1   | PCR            | <i>EcoRI/XbaI</i> | aagggtataatcttttgAACTTTAAGCTGAAAATGGCGCTGAAAAGGCGCCATTTTCATATTGTAGACAACGTAGGCTTTGTTTCATGCCGATGCCGCGTGAAC<br>GCCTTATCCGGCATGAAAACCCCTCAAATCCAATAGATTGCAGTGAACGTGTAGGCTGATAAGCGTAGCGCATCAGGCAATGTTGCGTTTGCATCAGTTT<br>CAAATGGCGCTGTAAGAGCGCTCATTTTCATATTGTAGACAACGTAGGCTTTGTTTCATGCCGATGCCGCGTGAACGCCCTTATCCGGCATGAAAACCCCTC<br>AAATCCAATAGATTGCAGTGAACGTGTAGGCTGATAAGCGTAGCGCATCAGGCAATGTTGCGTTTGCATCAGTTCTAAATGGCGCTTTATAAAgtagcattttt<br>attgcgtaaccagacggcgtaacgacac |
| C0465 | pHMB1   | Gene synthesis | <i>EcoRI/XbaI</i> | actcgtatcggcaaggaggGGGAACTTTATTGCTGATGCCACCCGCGCGAAATTGAAATAAAAAACCCGATGCCGAGATCATCGGGTTCATTTCaattgaggaatc<br>ggagaattacgcactctgacgccc                                                                                                                                                                                                                                                                                                                                 |
| C0614 | pHMB1   | Gene synthesis | <i>EcoRI/XbaI</i> | atfaccgaacacggcggaagGGCCGGTGTGCATAATACGCTAAATAACAATAATTACTCTCTTTTGCTTGACAAAAAGAGATTACTGGTGAGTATTGTTTTGCTGt<br>gaagcacctcgttgcctatgaacacaagtcaacctgct                                                                                                                                                                                                                                                                                                                   |
| C0664 | pHMB1   | PCR            | <i>EcoRI/XbaI</i> | atgccgatgtagtgggctactGTGCCTAAAATGTCGGATGCGACGCTGGCGCTTTATCCGACCTACGGGGACGCATGTGTAGGCCGATAAGGCGTTTACGCC<br>GCATCCGGCAATGGTGTCCAATGCAACacgftttatccgttctgacttaccgctaaccaacg                                                                                                                                                                                                                                                                                               |
| C0719 | pHMB1   | PCR            | <i>EcoRI/XbaI</i> | aagaggactgaactgataaaTATAGGCTTATACTTTACAGCAACAGTACGCCGCTAACGCAATTGCTACCTCTGGCATAACAAGTATATCGGGTAAGGGTTCTGTT<br>CCGCACACGAGAGCAGAGTATCGTTAAGATGTCCATATTGTTGTTTTAGGCCCGCTAGTAATGCGCTACGGGTATTAAATATTGTTAAACCCGTGATAATCG<br>CTCCGGTATTTCGGGATAAATGTACTACGcagttactatcatagccccgacaataaaacttccgggg                                                                                                                                                                            |
| CsrB  | pHMB1   | PCR            | <i>EcoRI/XbaI</i> | gTGCAGACGGGAGTCAACAAAGTGAACATCAGGATGATGACACTTCTGCAGGACACACCAGGATGGTGTTCAGGGAAAGGCTTCTGGATGAAGC<br>GAAGAGGATGACGCAGGACGCGTTAAAGGACACCTCCAGGATGGAGAATGAGAACCAGGTCAGGATGATTCGGTGGGTGAGGAAGGCCAGGGACACTTC<br>AGGATGAAGTATCACATCGGGGTGGTGTGAGCAGGAAGCAATAGTTTCCAGGATGAACGATTGGCCGCAAGGCCAGAGGAAAGTTGTCAGGATGAGCAG<br>GGAGCAACAAAAGTAGCTGGAATGCTGCGAAACGAACCGGGAGCGCTGTGAATACAGTGTCCCTTTTTTATTcctgctactcttccggcagtttt                                                        |
| CsrC  | pHMB1   | PCR            | <i>EcoRI/XbaI</i> | ATAGAGCGAGGACGCTAACAGGAACAATGACTCAGGATGAGGGTCAAGGAGCGCCAGGAGCGGAAGACAGAGGATTGTCAGGAAGACAACGTCGGGAG<br>ACGTAATTAACGGAATGGAATCAACACGGATTGTTCCGGCTAAAGGAAAAACAGGGTGTGTTGGCGCTGCAAGGATTGTAAGACCCGTTAAGGGTT<br>ATGAGTCAGGAAAAAGGCGACAGAGTAATCTGTCCCTTTTTTCTTgcttctctgttagattccg                                                                                                                                                                                             |
| CyaR  | pHM-tac | PCR            | <i>EcoRI/XbaI</i> | GCTGAAAAACATAACCCATAAAATGCTAGCTGTACCAGGAACACCTCCTTAGCCTGTGTAATCTCCCTTACACGGGCTTATTTTTTcgcgtaatacaatgaataaaa<br>ggatttttctgctcagctccacacattgaccacatcgacaaaaagccctcagctgaggggcttctglttcta                                                                                                                                                                                                                                                                                |
| DicF  | pHMB1   | PCR            | <i>EcoRI/XbaI</i> | aTTTTCTGGTGACGTTTTGGCGGTATCAGTTTTACTCCGTGACTGCTCTGCCGCCCTtttaaaagtgaatttggatggtggaatcggctgagcgc                                                                                                                                                                                                                                                                                                                                                                        |
| DsrA  | pHMB1   | PCR            | <i>EcoRI/XbaI</i> | AACACATCAGATTTCTGGTGAACGAATTTTTAAGTGCTTCTTGCTTAAAGCAAGTTTCATCCCAGCCCTCAGGGTCGGGATTTTTattgtgcttcaacgattca<br>cttca                                                                                                                                                                                                                                                                                                                                                      |
| EyeA  | pHMB1   | Gene synthesis | <i>EcoRI/XbaI</i> | agaaacacccggggcagcagcgtTCTATCAGCTTTCGTTGCTGACTTCTGCCAATTGCGCAAGCAAGGATAAAGAGTGCAGCGGGCAGCCTCCTCagtatcctgag<br>tccaggcaggtaaacgggggaaggcag                                                                                                                                                                                                                                                                                                                              |
| Ffs   | pHMB1   | Gene synthesis | <i>EcoRI/XbaI</i> | agGGGGCTCTGTTGTTCTCCCGCAACGCTACTCTGTTTACCAGGTGAGTCCGGAAGGAAGCAGCCAAGGCAGATGACGCGTGTCCGGGATGTACC<br>TGGCAGGGCCCCACCatttctgctcccaccgttctgta                                                                                                                                                                                                                                                                                                                              |
| FnrS  | pHMB1   | PCR            | <i>EcoRI/XbaI</i> | agCAGGTGAATGCAACGTCGAAGCGATGGCGTTGCGCTCCAATTTGCTTACTTCTTTTTGAATTACTGCATAGCACAAATTGATTCGTACGACGCCGACT<br>TTGATGAGTCCGCTTTTTTTTgcctgtattatcagcgtctacc                                                                                                                                                                                                                                                                                                                    |
| GadY  | pHMB1   | PCR            | <i>EcoRI/XbaI</i> | ACTGAGAGCACAAAGTTTCCCGTGCCAACAGGGAGTGTATAACGGTTTATTAGTCTGGAGACGGCAGACTATCCTCTTCCCGGTCCCCTATGCCGGTT<br>TTTTTatgtctgataaaactctataatc                                                                                                                                                                                                                                                                                                                                     |
| GcvB  | pHMB1   | PCR            | <i>EcoRI/XbaI</i> | ACTTCTGAGCCGGAACGAAAAGTTTTATCGGAATGCGTGTCTGGTGAACCTTTGGCTTACGGTGTGATGTTGTGTTGTTGTTGTTGCAATTGGTCTGC<br>GATTACAGACCTGGTAGCAAAGCTACCTTTTTTCACTTCTGTACATTTACCTGTCTGTCCATAGTGATTAATGTAGCACCGCCTAATTGCCGTGCTTTTT                                                                                                                                                                                                                                                             |

|        |         |                |                      |                                                                                                                                                                                                                                                                                                |
|--------|---------|----------------|----------------------|------------------------------------------------------------------------------------------------------------------------------------------------------------------------------------------------------------------------------------------------------------------------------------------------|
|        |         |                |                      | T Taccttggatcgcaactactgac                                                                                                                                                                                                                                                                      |
| GlmY   | pHM-tac | PCR            | <i>EcoRI/XbaI</i>    | AGTGGCTCATTACCCAGCTATGTGCAGCCCTTCGGGACGTGCTACATAAAATACGAATGACGCACAACAAGGTGCCTGCCGTCACACTCTGATATCAGC<br>GTAGCTATATCAACCATCGGGCGAAAACGTGAGTTAGGCACCGCCTTATTCCATAAACAAGCCGGTAATTCCCGGCTTTGTTtatctgacttcccccggttagcatca<br>ggctattcgcgtctgacgagagtagaacacctgaaacgctggccgcttttccccgctcattacgacaactg |
| GlmZ   | pHM-tac | PCR            | <i>EcoRI/XbaI</i>    | GTAGATGCTCATTCCATCTCTTATGTTCGCCTTAGTGCCTCATAAACTCCGGAATGACGCAGAGCCGTTTACGGTGCTTATCGTCCACTGACAGATGTCGCT<br>TATGCCTCATCAGACACCATTGACACACAGTTCAGTGAAGCACCCACTTGTGTGCATACAGACCTGTTTTAACGCCTGCTCCGTAATAAGAGCAGCGGCTTT<br>TTTTatgtatcaggaaggccccggaggtgcttgcctccgggtgagaaggaactactgtggcgggtatt       |
| IS118  | pHMB1   | PCR            | <i>EcoRI/XbaI</i>    | aGGTTCTGGAGGGGGTTTTGTTGTGGCAATGATGCATTTAAGTTATCGTCTGCAGATAGAGGAGATATTACAATAAACAACGAATCAGGGCATTGATAGTC<br>AATACCGCAATCTATCAGGAGATATAGTCACTCTAAGAGGAGGAGAAATTAGTTGGTATTATAGCTTGTGCGGCCATGATTGGCGCGCAATTTaaacttagtg<br>ctttacatcgtattgcttctgattcttgaattattataaataa                                |
| IS128  | pHMB2   | PCR            | <i>SmaI/XbaI</i>     | aagagagtaattattgttataTTTAGCGTATTATCGACACCCGGCCCTTCCCGCGTGTTCGGTAATAAAATAACCTGGCTTATAGTCCGAATTCAGACAAATATAAATAA<br>TCCTGCTCAAATATAAATTTCTAACCGGTAAGATATTACTTAAACATGTAAATTCACCTTCCCTTAAAAAACAAAAACCGCCAAATCAGGCGGTTTTTT<br>GTTGCTGGTCCGGTtcgcgcccttccagcagggtgattaccgtagtaatgca                  |
| McaS   | pHMB1   | PCR            | <i>EcoRI/XbaI</i>    | acgatattaataatgtaactatatttctgaaatctgtcactgaagaaaatggcaactaaagggttaaaccgttataacacagtcACCGGCGCAGAGGAGACAATGCCGATTTAAGACGGGAT<br>GCACCTGCTGTGTACTGTAGAGTCTGGCGGATGTGCAGACTCTATTTTTTATgcaatttaacttgcagatagccgact                                                                                   |
| IsrB   | pHMB1   | PCR            | <i>EcoRI/XbaI</i>    | atgtcatattataagcgcaaaGACAATAACACCTGTATAACAAATGGTCGGAGTGCCGCGATGAAACTGCGCAAAATCCTGAAAAGTATGTTCAATAACTATTGCAAGA<br>CGTTCAAAGACGTACCGCCAGGCAATATGTTCCGATAACAAAAACCTGCTCCGGCAGGTTTTTTTTGTGTCtgatgacggtggatgtgactatcgtgaagatgtaagtc                                                                 |
| IsrC   | pHMB1   | PCR            | <i>EcoRI/XbaI</i>    | atagctcaataatagaataaaaACGATCAATATCTATTTATCGATCGTTTATATCGATCGATAAGCTAATAAATACCTTTGTCAGTAACATGCACAGATACGTACAGAAA<br>ACATTCAGGGAACAACAGAACCAATTCAGAACTCCACAGCCGACCTCCGGCACTGTAACCTTTACCTGCCGATCCACGTTTTGTGGTACCGG<br>CTTTTTTATTACCCctcaatcaggaaaagctgatgaaa                                       |
| IstR-1 | pHMB1   | Gene synthesis | <i>EcoRI/XbaI</i>    | aGTTGACATAATACAGTGTGCTTTGCGGTTACCAGCCGACGCGACTGACGAAACCTCGCTCCGCGGGGTTTTTgttatctgcaattcagtaaaaacg                                                                                                                                                                                              |
| IstR-2 | pHMB1   | PCR            | <i>EcoRI/XbaI</i>    | aGCACTAAATACGTCAAATTCGTGCCGAATTCGCGGTTCTGCGCGAACACGTACTACTTTCAGTGTTGACATAATACAGTGTGCTTTGCGGTTACCAGCC<br>GCAGCGCACTGACGAAACCTCGCTCCGCGGGTTTTTTgttatctgcaattcagtaaaaacg                                                                                                                          |
| MgrR   | pHMB1   | PCR            | <i>EcoRI/XbaI</i>    | aGATTCGTTATCAGTGCAGGAAAATGCCTGTTAGCGTAAAAGCAAACACAAATCTATCCATGCAAGCATTACCGCCGTTTACTGGCGGTTTTTTTTTgcgcg<br>tcataaaaatcagggccctt                                                                                                                                                                 |
| MicA   | pHMB2   | PCR            | <i>SmaI/XbaI</i>     | aGAAAGACGCGCATTTGTTATCATCATCCCTGAATTCAGAGATGAAATTTGGCCACTCACGAGTGGCCTTTTTCTTTTctgtcagcggtgttttccagccac                                                                                                                                                                                         |
| MicC   | pHMB1   | PCR            | <i>EcoRI/XbaI</i>    | aGTTATATGCCTTTATTGTACAGATTTTTATTTCTGTTGGGCCATTGCATTGCCACTGATTTTTCCAACATATAAAAAGACAAAGCCCGAACAGTCTCCGGC<br>TTTTTTTTtagaattggataatccttatcagag                                                                                                                                                    |
| MicF   | pHMB1   | PCR            | <i>EcoRI/XbaI</i>    | aGCTATCATCAATACTTATTTATACCCTCATTCTTCTGAATGTCTGTTTACCCTATTTCAACCGGATGCCTCGCATTTCGGTTTTTTTTTaccctctttacacactt<br>tcatta                                                                                                                                                                          |
| MicM   | pHMB1   | PCR            | <i>EcoRI/XbaI</i>    | ACACCGTCGCTTAAAGTGACGGCATAATAAAAAAATGAAATTCCTCTTTGACGGGCAATAGCGATATTGGCCATTTTTTtagcgcaactttcggcaaatccc                                                                                                                                                                                         |
| OhsC   | pHMB1   | Gene synthesis | <i>EcoRI/XbaI</i>    | actgatccataatcgtgttGTTAGGGTGCATGCTGCACAAAATAAAGTAAAAAGTAAAACCCCGTTCCTTACCAGTTCGGGGTTTTACTTTtaaagagaacggtatt<br>atthttaa                                                                                                                                                                        |
| OmrA   | pHMB1   | PCR            | <i>EcoRI/XbaI</i>    | aCCCAGAGGTATTGATTGGTGAGATTATCCGTTACGCTCTTCGTACCCTGTCTTGCACCAACCTGCGCGGATGCGCAGGTTTTTTTTTgcgcaactaattactgtcg<br>ctcgcg                                                                                                                                                                          |
| OmrB   | pHMB1   | PCR            | <i>EcoRI/XbaI</i>    | aCCCAGAGGTATTGATAGGTGAAGTCAACTTCGGGTTGAGCAGATGAATTACACCAGCCTGCGCAGATGCGCAGGTTTTTTTTTgcggtcatcaatctgtaacagtaa<br>aGAAACGGAGCGGCACCTCTTTAACCTTGAAGTCACTGCCGTTTCGAGAGTTTCTCAACTCGAATAACTAAAGCCAACGTGAACTTTTGCGGATCTCC                                                                             |
| OxyS   | pHMB1   | PCR            | <i>EcoRI/XbaI</i>    | AGGATCCGCTTTTTggcataaaaaagccccgggataagc                                                                                                                                                                                                                                                        |
| PsrD   | pHMB1   | PCR            | <i>EcoRI/XbaI</i>    | aTAGGCATATTTTTCCATCAGATATAGCGTATTGATGATAGCCATTTAAACTATGCGCTTCGTTTTGCAGTTGATGTTTGTATCAGCACTGAACGAAAAT<br>AAAGCAGTAACCCGCAATGTGTGCAATTTGGCAAAGGCAACCACAGGCTGCCTTTTTCTTTgactctatgacttacaagtaaat                                                                                                   |
| PsrO   | pHM-tac | PCR            | <i>EcoRI/XbaI</i>    | ATCTTCTGCGCATCTCGCACTAATGACAACCTAACCCAGCTCTATGTGGGTAAAGCCTCTATTAGCCGCGCAACCTCTGCAACGGAAGATCATTCA<br>TAGCAACAATACATTAGTTCCAGTGAATTGCTGCCGTACGTTGAAAAAGGGGCCACTCAGGCCCTTTTctgaaactcgcaagaattagcgagcagaccaggcgc<br>tcgatgactgggtgaactgctactctttacggttagcagcaggttacgacg                            |
| RdIA   | pHMB1   | Gene synthesis | <i>EcoRI/XbaI</i>    | atttgcggtattctgaaattGTTCTGTTCAAGATTAGCCCCGTTCTGTTGCAGGTTGTACCTCTCAACGTGCGGGGTTTTCTCtttcagcaaccaatgcccaggataa<br>agccccgcaa                                                                                                                                                                     |
| RdIB   | pHMB1   | Gene synthesis | <i>EcoRI/XbaI</i>    | aGTCTGGTTTTCAAGATTAGCCCCGTTCTGTTGTCAAGTTTTACCTCTCAACGTGCGGGGTTTTCTCtttcagcaaccaatgcccaggataaagccccgca                                                                                                                                                                                          |
| RdIC   | pHMB1   | Gene synthesis | <i>EcoRI/XbaI</i>    | aGTCTGGTTTTCAAGATTAGCCCCGTTTGTGTCAGGTTTTACCTCTCAACGTGCGGGGTTTTCTCtttcagcaaccaatgcccaggataaagccccgca                                                                                                                                                                                            |
| RdID   | pHMB1   | Gene synthesis | <i>EcoRI/HindIII</i> | aGTCTAGAGTCAAGATTAGCCCCGTTGTTGTCAAGTTTTACCTCTCAACGTGCGGGGTTTTCTCtttcagcaaccaatgcccaggataaagccccgca                                                                                                                                                                                             |

|      |         |                |                   |                                                                                                                                                                                                                                                                                                                                                                                                                                                                                                                        |
|------|---------|----------------|-------------------|------------------------------------------------------------------------------------------------------------------------------------------------------------------------------------------------------------------------------------------------------------------------------------------------------------------------------------------------------------------------------------------------------------------------------------------------------------------------------------------------------------------------|
| RnpB | pHMB1   | PCR            | <i>EcoRI/XbaI</i> | GAAGCTGACCAGACAGTCGCCGCTTCTGTCGTCGTCCTTTCGGGGGAGACGGGGCGGAGGGGAGGAAAGTCCGGGCTCCATAGGGCAGGGTGCCAGGTAACGCCTGGGGGGGAAACCCACGACAGTGC AACAGAGAGCAAAACCCCGATGGCCCGCGCAAGCGGGATCAGGTAAGGGTGAAGGGTGCGGGTAA GAGCGCACCCGCGCGCTGGTAAACGTCCTGGCACGGTAACTCCACCCGAGCAAGGCCAAATAGGGTTATAAGGTACGGCCCGTACTGAACCCG GGTAGGCTGCTTGACCCAGT GAGCGATTGCTGGCCTAGATGAATGACTGCCACGACAGAACC CGCTTATCGGTAGTTTACCTgatttacgtaaaaccgcttcg ggggggtttgctttg                                                                                             |
| RprA | pHMB1   | PCR            | <i>EcoRI/XbaI</i> | ACGGTTATAAATCAACATATTGATTTATAAGCATGGAAATCCCCTGAGTGAAACACGAATTGCTGTGTAGTCTTTGCCATCTCCACGATGGCTTTTT TTTAacattttccgctctgctacctcg                                                                                                                                                                                                                                                                                                                                                                                          |
| RseX | pHMB1   | PCR            | <i>EcoRI/XbaI</i> | aTTTTTATTATTCTGTGCATGATGCTTCCGTTATAGCCTTTATCGTCTTGTTTATATTTTTTGGGCCGCGATGATGCCGGCTTTTTTTTatgcctcattaatgtgccc tgat                                                                                                                                                                                                                                                                                                                                                                                                      |
| RttR | pHMB1   | PCR            | <i>EcoRI/XbaI</i> | atccccaccaccatcactttCAAAAGTCCCTGAACCTCCAACGAATCCGCAATTAATATTCTGCCATGCGGGGAAGGATGAGAAGCTTCGACCAAGTTTCGAC TCAGAGCGCCAGCGAGAGAGCGTTGCCGAGGCAACGACCCGAAGGGCGAAGCGCGCAGCGCTGAGTAATCTTCCCCACCACTcactttcaaaagtcctg aacttcaagcgaatccgcaa                                                                                                                                                                                                                                                                                       |
| RybA | pHMB1   | PCR            | <i>EcoRI/XbaI</i> | agcctgtctatatctgtatgaatgcaaaTCATCCCTCAAGGATCGACGGGATTAGCAAGTCAGGAGTCTTATGAATGAGTTCAAGAGGTGTATGCGGTGTTTAGTCAT TCTCCCTTAAAGTACGGTTAATGCTGCTCTCTATGTTGTGCGATATGGTCAACAACAAACCGCAGCAAGATAAACCTTCCGATAATAGCGGGCTGCGGGT ACGCCGCTTCACTcctgctttcattgcaggcataaccgctttggctgaaaa                                                                                                                                                                                                                                                  |
| RybB | pHMB1   | PCR            | <i>EcoRI/XbaI</i> | ACTGCTTTTCTTTGATGTCCTCATTTTGTGGAGCCCATCAACCCCGCATTTCGGTTCAGGTTGATGGTTTTTTGTatctaaactatctactacctgc                                                                                                                                                                                                                                                                                                                                                                                                                      |
| RybD | pHMB1   | PCR            | <i>EcoRI/XbaI</i> | ATATCTGTAATAAGAAATAGCCCTGCCCTTCCCTCTACAGGAATGGCGAAGGGCTGTCGGTTTCGACATGTTGGCCATCGTATGATGGCTTTTTTgtgc ttatcgcgatgatttgcgctg                                                                                                                                                                                                                                                                                                                                                                                              |
| RydB | pHMB1   | PCR            | <i>EcoRI/XbaI</i> | actaatgcagttgtgtaaaacgggggttagctttatgagATTATTCTTATCGCCCTTCAAGAGCTAAGCCACTGAGAGTGCCCGGAGATAAGCGCCGGATGGGGTAGAAAC CCTTAAGCctgtgtcgcacagacttaagggtttcttattct                                                                                                                                                                                                                                                                                                                                                              |
| RydC | pHMB1   | PCR            | <i>EcoRI/XbaI</i> | aCTTCCGATGTAGACCCGATTCTTCGCTGTACCACGGGTGCGTTTTAGTACAGGGTTTTTCTTaaatctcctcaggaaagctttacg                                                                                                                                                                                                                                                                                                                                                                                                                                |
| RyeA | pHM-tac | PCR            | <i>EcoRI/XbaI</i> | AAAGTCAGCGAAGGAAATGCTTCTGGCTTTAACAGATAAAAAGAGACCGAAGACGATTCCGTATTTCGGTCCAGGAAATGGCTCTTGGGAGAGAGCCG TGCGCTAAAAGTTGGCATTAAATGCAGGCTTAGTTGCCCTTGAAGAAATAGATGACGACGCCAGGTTTTCCAGTTTTCGCTGCAAAATGGTCAATAAAAA CCGTGGTGGTTCATCAGCTGAAATGTTAAAAACCGCCCGTTCTGGTGAaagaactgaggcggTTTTTattggaaatcaaaaggcttttaggtaataacagagatttttagctgctcataaac ggtgacagactatcttttgcgggattgttaggatcatcaatctgaatcaccgaaatgggtgggcatggtcttccactgccaactcctttgtgcatatcgttaaaggatactgcagaggggtactcggattaataacatac aaagcattaccgggtcggcaagtcagcatcactcttgc |
| SdsR | pHM-tac | PCR            | <i>EcoRI/XbaI</i> | GGCAAGGCAACTAAGCCTGCATTAATGCCAACTTTTAGCGCACGGCTCTCTCCAAGAGCCATTTCCCTGGACCGAATACAGGAATCGTGTTCGGTCTCT TTTTatctgtaaaagccagaagcatttctctgctgactttat                                                                                                                                                                                                                                                                                                                                                                         |
| RyeF | pHMB1   | PCR            | <i>EcoRI/XbaI</i> | ATTTTACCCTTGCATCATGTCCGCAATATGATGCTTGTCTGTACCAGGCCCTGCAATTTCAACAGGGCCTTTTTTATCCCTGAACAGTATAAAAAACG AACGATAACCGTGATCTGTTGAGCGGGTGACAGTGCGCATAGCGTTGTGCTAAAAAATATTGTATATATTACATTAATATGAGGATTAAATTAATAAACTGA TAAATATATATTCTAATAGCAACTGGGTATTCTTAGCAATTAATGATTACATTGTAATAAATCATATTCTTATCGATTGTTTACAGGAGTGTGTGCTTAATT ATGCAAGCGGGTAAATTCGTTGTATATTAATATAACAATGATTCGGTGTCCAGTAATTAATAGAGGAATCT                                                                                                                               |
| RyfA | pHMB1   | PCR            | <i>EcoRI/XbaI</i> | aGCGGCCCTTTCCGCCGCTCGCAAACGGCGCTGGCTTTAGGAAAGGATGTTCCGTGGCCGTAATGCAGGTGTTTACAGCGCTTGTATCGCGGCA ATATCGCCAGTGGTGTGCTGATGCGGTCTTCGCATGGACCGCACAAATGAAGATACGGTGTCTTTGTATCGTACTTATTGTTTCTGGTGGCTGTTAAC CGAGGTAATAATAACCGGAGTCTCTCCGGCGACAATTTACTGGTGGTTAAACAACCTTCAGAGCAGCAAGTAAGCCCGAATGCCGCCCTTTGGCGGGCAT ATTTTtagattatccgattctgtttaaagtc                                                                                                                                                                                 |
| RyfB | pHMB1   | PCR            | <i>EcoRI/XbaI</i> | aCGTTATTGAAGATTTTGTGTGCTTTACACCATGCCACAGAATCCCCATTGAAACGAGTGGTGTGCTCAAAGCTCTGGTGTGGAGTGCAGCATGCACC CTCAATAACTCGCACGTTTCAAGTTTTGGGGAGATGTAAGGGCTAATCTGAATGGCTGCATTCTTGTTTAAGGAAAAACGAATGACTGATTGCCGATACCTGA TTAACCGGGTCAATAAATCATCATTGCTGTTTACAGCTGATCTTCTGTTCTTATAACACAAGGAACGTAAGGTGCGTCCGGTGAACCAAGTCGGA CGCACCTTAAATAAActataaataaagtgctgggcagatactataaattaact                                                                                                                                                       |
| RyfD | pHMB1   | PCR            | <i>EcoRI/XbaI</i> | AATCAAGACGATCCGGTACGCGTGAATTTCTTTTACATTAATCTGGTCAATAACCTTGAATAATTGAGGGATGACCTCATTAAATCTCCAGTAGCAACTTTGA TCCGTTATGGGAGGAGTTATGCGTCTGGATCGTCTTACTaataaattccagcttgccttgcgcatgccaactcact                                                                                                                                                                                                                                                                                                                                   |
| RyhB | pHM-tac | PCR            | <i>EcoRI/XbaI</i> | GCGATCAGGAAGACCTCGCGGAGAACTGAAAGCACGACTTGGTCACTTGTCCAGTATTACTTAGCCAGCCGGGTGCTGGCTTTTTtttgatcttctgtctc aatttatccacgggagtgctgtgttctgtatgctgactcagtaggaaccacgcttgcgtaagggtgaaataac                                                                                                                                                                                                                                                                                                                                        |
| RyjA | pHMB1   | Gene synthesis | <i>EcoRI/XbaI</i> | ATCAACCAACCGGAACCTCCACCACGTGCTCGAATGAGGTGTTGACGTGCGGGGAAACCCCTCTGTGTACCAGCGGGATAGAGAGAAGACAAAG ACCGGAAAAACAACATAAAGCGCCCTTGTGGCCTTTAGTTT                                                                                                                                                                                                                                                                                                                                                                               |
| RyjB | pHMB1   | Gene synthesis | <i>EcoRI/XbaI</i> | aTTCATCCGTCGTTGACTCCATGCCGATTCCGGTTAATCTGGTAGCGATCCCCGTCGATCTTTTACGAAAGGCGGCAGGATCGCAGAAGGgttattgctctttgccc gggataaagcctctgctatccc                                                                                                                                                                                                                                                                                                                                                                                     |
| SgrS | pHMB1   | PCR            | <i>EcoRI/XbaI</i> | aGATGAAGCAAGGGGGTGCCCATGCGTCAGTTTTATCAGCACTATTTACC CGCACAGCGAAGTTGTGCTGTTGCGTTGGTTAAGCGTCCCACAACGA                                                                                                                                                                                                                                                                                                                                                                                                                     |

|        |       |                |                   |                                                                                                                                                                                                                                                                                                                                                                                                                 |
|--------|-------|----------------|-------------------|-----------------------------------------------------------------------------------------------------------------------------------------------------------------------------------------------------------------------------------------------------------------------------------------------------------------------------------------------------------------------------------------------------------------|
|        |       |                |                   | TTAACCATGCTTGAAGGACTGATGCAGTGGGATGACCGCAATTCTGAAAGTTGACTTGCCTGCATCATGTGTGACTGAGTATTGGTGAAATCACCCGCC<br>AGCAGATTATACCTGCTGGTTTTTTTattctcgcgcgctaaaagggaac                                                                                                                                                                                                                                                        |
| SibA   | pHMB1 | Gene synthesis | <i>EcoRI/XbaI</i> | aGAGGGTTAGGGAGAGGTTTTCCCCCTCCCCCTGGTGTCTTAGTAAGCCTGGAAGCTAATCACTAAGAGTATACCAGTATGATGACGTGCTTCATCATAA<br>CCCTTTCTTATTAAGCCCTCTCTCCGGGAGAGGCTTCCCGtttcagctgcccgtgaatcatc                                                                                                                                                                                                                                          |
| SibB   | pHMB1 | Gene synthesis | <i>EcoRI/XbaI</i> | aGAGGGTAGAGCGGGTTTTCCCCCGCCCTGGTAGTCTTAGTAAGCGGGAAGCTTATGACTAAGAGCACCAGATGATGAGTAGCTTCATCATGACCCCTT<br>TCCTTATTTATGGCCCTTCCCTCGGAGGGGCTtcccgtttcagcgtcccgcgtaaatcgt                                                                                                                                                                                                                                             |
| SibC   | pHMB1 | Gene synthesis | <i>EcoRI/XbaI</i> | AAGGGTAAGGGAGGATTGCTCCTCCCTGAGACTGACTGTTAATAAGCCTGAAACTTATGAGTAACAGTACAATCAGTATGATGACAAGTCGCATCATAAC<br>CCTTCTCCTCAAGCCCTCGCTTCGGTGAGGGCTTACCGtttacagccccatgctgcccgtcca                                                                                                                                                                                                                                         |
| SibD   | pHMB1 | Gene synthesis | <i>EcoRI/XbaI</i> | ACAAGGGTGAGGGAGGATTCTCCCCCTCTGATTGGCTGTTAATAAGCTGCGAACTTACGAGTAACAACAATCAGTATGATGACGAGCTTCATCATAA<br>CCCTTTCCCTCTGTAAGGCCCTTCTTCGGGAGGGGCTTTCcgtttcagccccctgctgactcccc                                                                                                                                                                                                                                          |
| SibE   | pHMB1 | Gene synthesis | <i>EcoRI/XbaI</i> | ACAAGGGTAAGGGAGGATTCTCCCCCTCTGATGAGTTGTAGTAAGTCGGGAAACTTAACAGTAACAACAACCAACAGTATGATGACGAGCTTCATCATA<br>ACCCTTTCTTATACAAGGCCCTTCTTCGGGAGGGGCTTTCcgtttcagccccctgctgccccccg                                                                                                                                                                                                                                        |
| SokA   | pHMB1 | Gene synthesis | <i>EcoRI/XbaI</i> | AACTTTGATTTATAGTCAGTGGGGCTTTTctctgtcgtcttcggtgaatcctgagacaacagctc                                                                                                                                                                                                                                                                                                                                               |
| SokB   | pHMB1 | Gene synthesis | <i>EcoRI/XbaI</i> | aGCTAGGTTTCATTCTGTTGGCCTCGGTTGATAGAAATATCGGTCGGGGCCTTCGTCTTctgattcccgttagcctgaaaacagaaagctcaggca                                                                                                                                                                                                                                                                                                                |
| SokC   | pHMB1 | Gene synthesis | <i>EcoRI/XbaI</i> | aGTTTCAGCATATAGGAGCCTCGGTTGATGGTAAAATATCACTCGGGGCTttctctatcgtcgtcagtaatgctgagacagacagctca                                                                                                                                                                                                                                                                                                                       |
| SokE   | pHMB1 | Gene synthesis | <i>EcoRI/XbaI</i> | AAATGAAGCCCCAGGAGATATTTCTATCAACCCTGGGGCTGCCACTCCAAACCCGAACaatttggatgtagtccctcttcgcatggaggcaatata                                                                                                                                                                                                                                                                                                                |
| SokX   | pHMB1 | Gene synthesis | <i>EcoRI/XbaI</i> | aTTTGGGTTCGAACGCTGGCCTCAGGTTGATAGAAATATCGCCTGGGGCTTTTGTCatctggaacctcgcgaatgcttaacgcccagacagcctcaa                                                                                                                                                                                                                                                                                                               |
| Spf    | pHMB1 | PCR            | <i>EcoRI/XbaI</i> | aGTAGGGTACAGAGGTAAGATGTTCTATCTTTCAGACCTTTTACTTCACGTAATCGAATTTGGCTGAATATTTAGCCGCCAGCTCAGTAATGACTGGGGC<br>GTTTTTATTggcgaaagaaaagatccgtaatgctgatgctc                                                                                                                                                                                                                                                               |
| SraA   | pHMB1 | Gene synthesis | <i>EcoRI/XbaI</i> | atatgggatggttcccccaCATTCAACGCCGAGAATAGAGAAAAATTAAGGGGAGATAAAATCCCCCTTTTTGgttactaattgatggaaatggtt                                                                                                                                                                                                                                                                                                                |
| SroA   | pHMB1 | Gene synthesis | <i>EcoRI/XbaI</i> | aCACTAACGCCGTTCTCAACGGGGTGCCACGCGTACGCGTGCCTGAGAAAATACCCGTCGAACCTGATCCGATAACGCCGGCGAAGGGATTTGAGGC<br>TCTTctcaagtcttggcactctttt                                                                                                                                                                                                                                                                                  |
| SroC   | pHMB1 | PCR            | <i>EcoRI/XbaI</i> | AAGGCACTGAACATAACAAGAACCAGGGGCGGAAATCCAGCCCTCTCGATTGTTACGTAGCACGGACAGACTATACGCCTGATGGTCGTTCCCATC<br>GGCCCTGAAACCCGCAATACGCTGGGTAACAATCTCGAGGGTAGCAGTTAACGCTGCTACCCTTTTTTCTggagtagatttatgctatagactg                                                                                                                                                                                                              |
| SroD   | pHMB1 | Gene synthesis | <i>EcoRI/XbaI</i> | agaaaaatttgcgacgagaaTTACGTGACGAAGCGCGGCAAAAGTGACAATAAAGCCTGAGCGTTAAGTCAGTCGTGACAGCCGGTTAATCCGGCGTTTTT<br>TTTgaccccactaaagaaaaacaat                                                                                                                                                                                                                                                                              |
| SroE   | pHMB1 | PCR            | <i>EcoRI/XbaI</i> | agttcagcaggtgaaaaataATAACGTGATGGGAAGCGCCTCGCTCCCGTGATGATTGAACCCGCATGGTCCCGAAACATTGAGGGAAGCGTTGAGGGTTCA<br>TTTTTATattcagaagagataaaactgtgca                                                                                                                                                                                                                                                                       |
| SroG   | pHMB1 | PCR            | <i>EcoRI/XbaI</i> | aGCTTATTCTCAGGGCGGGCGAAATCCCCACCGCGGTAATCAACTCAGTTGAAAGCCCGGAGCGCTTTGGGTGCGAACTCAAAGGACAGCAGAT<br>CCGGTGTAATCCGGGGCCGACGGTTAGAGTCCGGATGGGAGAGAGTAACGattctgctggcatggaccgctcagttatttggctat                                                                                                                                                                                                                        |
| SroH   | pHMB1 | PCR            | <i>EcoRI/XbaI</i> | aGAAAATAAGAACACATGTTCTATCTCCAGGATGCAGCAGACTGAAGAAATTCAGACATCCCGCAACCTGCGATTATCGCAAGGTCAAGGCAAAGTCCG<br>GTAATGGCGTTCTGAATACCAGAGATAATTTCTGCGAAACCCACTTAAGGTGGTTTTTgttatttggggctgaggaagctg                                                                                                                                                                                                                        |
| SsrA   | pHMB1 | PCR            | <i>EcoRI/XbaI</i> | aGGGGCTGATTCTGGATTTCGACGGGATTTGCGAAACCCAAGGTGCATGCCGAGGGGCGGTTGGCCTCGTAAAAAGCCGCAAAAAATAGTCGCAACGAC<br>GAAACTACGCTTTAGCAGCTTAATAACCTGCTTAGAGCCCTCTCTCCCTAGCCTCCGCTCTTAGGACGGGGATCAAGAGAGGTCAAACCCAAAAGAGATC<br>GCGTGGAAGCCCTGCCCTGGGTTGAAGCGTTAAAACCTTAATCAGGCTAGTTTGTAGTGGCGTGTCCGTCCGACAGCTGGCAAGCGAATGTAAGACTGA<br>CTAAGCATGTAGTACCGAGGATGTAGGAATTTCCGACGCGGGTTCAACTCCCGCAGCTCCAccaaaattctccatcggtgattaccaga |
| SsrS   | pHMB1 | PCR            | <i>EcoRI/XbaI</i> | agaagacaaaATTTCTCTGAGATGTTGCAAGCGGGCCAGTCCCCTGAGCCGATATTTATACCACAAGAAATGTGGCGCTCCGCGGTTGGTGAGCATGCTCG<br>GTCCGTCCGAGAAGCCTAAAACCTGCGACGACACATTACCTTGAACCAAGGGTTCAAGGGTACAGCCTGCGGCGGCATCTCGGAGATTCCcttctatctgpc<br>accagccatga                                                                                                                                                                                  |
| SymR   | pHMB1 | Gene synthesis | <i>EcoRI/XbaI</i> | AGTCATAACTGCTATTCTCCAGGAATAGTGATTGTGATTAGCGATGCGGGTGTGTTGGCGCATCCGCACCGCGCTaaatacctgtatatcatcagtaa                                                                                                                                                                                                                                                                                                              |
| T44    | pHMB1 | PCR            | <i>EcoRI/XbaI</i> | atttgggtataaagcgcgCGGACTTCCGATCCATTTCTGATACACAGACTGGACGGAAGCGACAATCTCACTTTGTGTAACAACACACAGTATCGGCATATTC<br>CGGGTGCCCTTTGGGTCCGTAATATGGGATACGTGGAGCATAAACcacaacttttatagagggtttaaactatggcaactgttc                                                                                                                                                                                                                 |
| Tp2    | pHMB1 | PCR            | <i>EcoRI/XbaI</i> | ataattttaccagaaaaatcACTAATCTTTCTGTTGCTCCAGACGACGACAGAGAACGCTCACGGCGCTCTCTTACGACTTCTGTGCGAAAAATTTCTTCGATAA<br>AGCCAGATGGCGATGCGATGCTTCGCGCGTCTTCCGGCTTACCGGCCATAATCGCTTCAAATATGCGGGTgcggtgactactaccagcggcagcatctcgcgacgc<br>ga                                                                                                                                                                                   |
| Tpke11 | pHMB1 | Gene synthesis | <i>EcoRI/XbaI</i> | aagtcaagacaaaaataaTCGCCCTATAAACGGGTAATATACTGACACGGGCGAAGGGGAATTTCTCTCCGCCGTGCATTATCTAGGGGCAATTTAAAAA<br>AGAtggctaagcaagattattacgagattttaggcgttccaaa                                                                                                                                                                                                                                                             |
| Tpke70 | pHMB1 | PCR            | <i>EcoRI/XbaI</i> | aaggaaaaaccttaagaaaAAGCCATAAAAACCATGAGGTTATTATGGCCGATTTGAGGAGGGAAAGAGTAAGAGCAGTTTGTAAATGTACAACGACGATCT                                                                                                                                                                                                                                                                                                          |



|       |       |                 |                   |                                                                                                                                                                                                                                                                                                                                                                                                |
|-------|-------|-----------------|-------------------|------------------------------------------------------------------------------------------------------------------------------------------------------------------------------------------------------------------------------------------------------------------------------------------------------------------------------------------------------------------------------------------------|
|       |       |                 |                   | CCCACCGGGCGGTTTTAAAGCGACGGTGGATCCAGAGGACTGCTCCGGTGCGCGCATGATCTCTTTCTCGATAATCTTGTTCATATAGGCAGCGGCTTGATTTTCATCTGTCCGGTAGCCTTCCATCTCTGGGGTGATGAACAACGATATCCGCTGTAATCCGCTTTTCTTACCATCGTTACGGTCAACATGGCTGCGCCAGAGAGACGGGAGAGAACATAGGTGCCATTGGTTGTGGCGACATTTTCCACCGCAAAGAACGGCGCGAAGGAGCTGCCTTTACGACCATAATCCTGATCGGGAGCAAACCATACCGCTTACCTTTCTCAGTGCACCGACAATGCCgcccagattattctgccgatcatcgcttttagagcgc |
| pRNA  | pHMB1 | Oligo Annealing | <i>EcoRI/XbaI</i> | ATCGGCTCAGGGGACTGGCC                                                                                                                                                                                                                                                                                                                                                                           |
| Och1  | pHMB1 | PCR             | <i>EcoRI/XbaI</i> | <u>a</u> TGCTTTGGTAGAGGAAAGTGCTAAATAATAATCAATTGTTAAATATTGTGCATTTCACTACTGGAAGTGAATCAGAAAAGATAGACATGCTTAGCCAATCTCTATTGATTGAATTGAAAGATGTTTGTAAAGGCATGGATGCAAGCTATAGATTCTGATACGGTCAATAAAAGAGAATTGCTTAAACAATTTTGCAAAATGTATTGGCGAGTAAGAACCATTGGTACTTTCCGGGCAACCGCCAGACGAttctttatgtaatgagaataataacaattaaagagcg                                                                                        |
| Och2  | pHMB1 | PCR             | <i>EcoRI/XbaI</i> | <u>a</u> TGCGCATCAGTAATAAATGACACACAGCAAAATGAATCCGTTTATTTGGGTACTTATAATCCTGATGACGCTAGACGCGCTGCGGGAATTGGCTGGCGCTTCGCTATTTTAGGATGGCTATTAACGTTGGTTTGAGCTGGCAATAAGTCCGGACGGGATTTTACCAGTCCGGACTTATTTTTCAGgctgcagacgacgatgcaaacg                                                                                                                                                                       |
| Och3  | pHMB1 | PCR             | <i>EcoRI/XbaI</i> | ATATATAATTTATATTATTCAGGCAATGAATTACTTTTGAAGCCATCGCATTCTCTTATGTTATTAATGAGTTATGCTGATTTGTTAAGCAGTTTATCAGGCTTGAATGGCGTCCAGCCCCGACAGGTGAATCGTCCGGGCTGATTTTTCTTATTATTCAGCAGAAAATTCTCGAGGAACTGGCGGGTGCGAGGCTGCTCGGGTCCGCAAAT                                                                                                                                                                           |
| Och4  | pHMB1 | PCR             | <i>EcoRI/XbaI</i> | <u>a</u> CGATATATGTTTATTTATGTAAATCAATTTATGTA AAAAGTCACATCATTGTAGTTAAAAAGGTTGAGTTAGATCGCAGAAACGGGTACATATAGCCCCGCAACGTGACCACGCCCGCAGATATTACTTAAATCAGAGCCATAGAGGCCACGCGAGGCAATCAATCTTTACGATCTGTATAAGACGGATTGTTGATGATGTGTTAAATGATGTAACAAATTTGTGA <u>Agtgaatgctccgggaaaataagtactcattacaa</u>                                                                                                        |
| Och5  | pHMB1 | PCR             | <i>EcoRI/XbaI</i> | ATCCTTGTCCGCTTAACCGTTTCAGTCAGCCTATCCTTGATGAAACCGCGAGCAAAGATAGGTGATTACGTCATGGTTTTACAGAAAATACAGAAAAGGAGCAATATCGGGTAAAGGCATTAGCCCCGACGAATACGTCGGGCTACAAATATTATTgtctgcaggttttagcgggtg                                                                                                                                                                                                              |
| Och6  | pHMB1 | PCR             | <i>EcoRI/XbaI</i> | <u>a</u> GCGCCTTGAAAAGAGGCCAAAGCCTGCCATTTTAGCTCAATTCGGCGATGACCTGGATCAATCGTCCCGCCTGCTTTATCAACTGCATAATCAATCAAAATAccgaaattcatgcataatcacataaatcacttttgctta                                                                                                                                                                                                                                         |
| Och7  | pHMB1 | PCR             | <i>EcoRI/XbaI</i> | <u>a</u> GGTGAGCACTGAACAATTAAGAACAGCGTATTACATTTACTTTCCCCAAGATATGCGAAGAGCTTTCCTGAAACATTAACCGATCGTATAAACGAATGCCTGATAGTACTCCTGTCCGGCATTGTTATACAAGTAGACTACGCTTATCACAGCTTcccatcaagttcgatttttctgaaccgctaaatcattc                                                                                                                                                                                     |
| Och8  | pHMB1 | PCR             | <i>EcoRI/XbaI</i> | <u>a</u> CAGGATCACTAAGAGGACATTGCGCTTGGACACACCCAGTAGATACTGGCTCACTATCCTGTATCCAGGATCAACTCCTAAGGCTATCCCTTTTTGCTGATAGCCTTAGCGGTTGTACGCGACCTCAATTTTCCCGTCCgctgagtcaggtgtttaatggtct                                                                                                                                                                                                                   |
| Och9  | pHMB1 | PCR             | <i>EcoRI/XbaI</i> | ACCATCGTCAAAAAGGGCTGCACCAGATGTGAATGTTGCACCAATATAGTGTTCATGGAACATTAAGCAccatgttggtgcaatgaccttggga                                                                                                                                                                                                                                                                                                 |
| Och10 | pHMB1 | PCR             | <i>EcoRI/XbaI</i> | ATACTAGCCACTGAAAATGCCGGTTCACTTTCTCGAATCGGCTTCAATGTGTAATTTACACAAAATTAATCAACTCCCTTCCGAGGATCTGGCCTGAAAGGTGgataagatatgtaaacagatatttagtcatactctgct                                                                                                                                                                                                                                                  |

Predicted sRNA sequences were indicated by capital letters.

An extra adenine nucleotide to facilitate efficient transcription was indicated by underline.

**Supplementary Table 3. Oligonucleotides sequences used in this study**

| Name         | Sequence (5' to 3')                                                                      | Used for                            |
|--------------|------------------------------------------------------------------------------------------|-------------------------------------|
| BamH1ss6F    | CGGGATCCATAAATGTGAGCGGATAACATTGACAT<br>TGTGAGCGG                                         | Constructing pHMB1                  |
| HindIIIss6R  | CCCAAGCTTGTCTGACTCTAGAATTATATTGTTATCC<br>GCTCACAAATGTC                                   | Constructing pHMB1                  |
| pHMB1oligo1  | AATTCGAGCTCGCGTCTAGAGCCGGCAAGCTTGG<br>AGTACGTAAAAACCCGCTTCGGCGGGTTTTTGGCTT<br>TTGGAGGGGC | Constructing pHMB1                  |
| pHMB1oligo2  | AGCTGCCCCCTCCAAAAGCAAAAACCCGCCGAAGC<br>GGTTTTTACGTACTCCAAGCTTGCCGGCTCTAGA<br>CGCGAGCTCG  | Constructing pHMB1                  |
| pHMB2 oligo1 | GAGCGGATAACAATATAATGAACCCGGGCTCGCG<br>TCTAGAGCCGGCAAG                                    | Constructing pHMB2                  |
| pHMB2 oligo2 | CTTGCCGGCTCTAGACGCGAGCCCGGGTTTCATTA<br>TATTGTTATCCGCTC                                   | Constructing pHMB2                  |
| rnpB Xb1     | ACTCCAAGCTTGCCGGCTCTAGA                                                                  | Northern probe for modified rnpB T1 |
| C0067Fw      | GGC TGA ATT CAT AAG AGT TAG CTG T                                                        | C0067 cloning into pHMB1            |
| C0067Rv      | GGC TTC TAG AGA GTT AAA CCT CTA T                                                        | C0067 cloning into pHMB1            |
| C0362Fw      | GGC TGA ATT CAA GGG ATA TAA TCT C                                                        | C0362 cloning into pHMB1            |
| C0362Rv      | GGC TTC TAG AGT GTC GCG ATT ACG C                                                        | C0362 cloning into pHMB1            |
| C0664Fw      | GGC TGA ATT CAT GCC GAT GTA GGT G                                                        | C0664 cloning into pHMB1            |
| C0664Rv      | GGC TTC TAG ACG CGT TGG TTA GCG G                                                        | C0664 cloning into pHMB1            |
| C0719Fw      | GGC TGA ATT CAA GAG GAC TGA ACT G                                                        | C0719 cloning into pHMB1            |
| C0719Rv      | GGC TTC TAG ACC CCG GCA AGT TTT A                                                        | C0719 cloning into pHMB1            |
| CsrBFw       | GGC TGA ATT CAG TCG ACA GGG AGT C                                                        | CsrB cloning into pHMB1             |
| CsrBRv       | GGC TTC TAG AAA AAA CTG CCG CGA A                                                        | CsrB cloning into pHMB1             |
| CsrCFw       | GGC TGA ATT CAT AGA GCG AGG ACG C                                                        | CsrC cloning into pHMB1             |
| CsrCRv       | GGC TTC TAG AGG CGG AAT CTA ACA G                                                        | CsrC cloning into pHMB1             |
| IS128Fw      | AAG AGA GTA ATT ATT GTT TAT                                                              | IS128 cloning into pHMB2            |
| IS128Rv      | GGC TTC TAG ATG CAT TAC TAC GGT A                                                        | IS128 cloning into pHMB2            |
| McaSFw       | GGC TGA ATT CAC GAT ATT AAT AAT G                                                        | McaS cloning into pHMB1             |
| McaSRv       | GGC TTC TAG AAA TGC GGC TAT CTG C                                                        | McaS cloning into pHMB1             |
| IsrBFw       | GGC TGA ATT CAT GTC ATA TTA TAA G                                                        | IsrB cloning into pHMB1             |
| IsrBRv       | GGC TTC TAG AGA CTT CAC ATC TTC A                                                        | IsrB cloning into pHMB1             |
| IsrCFw       | GGC TGA ATT CAT AGC TCA ATA ATA G                                                        | IsrC cloning into pHMB1             |
| IsrCRv       | GGC TTC TAG ATT TCA TCA GCT TTT C                                                        | IsrC cloning into pHMB1             |
| IstR2Fw      | GGC TGA ATT CAG CAC TAA ATA CGT C                                                        | IstR2 cloning into pHMB1            |
| IstR2Rv      | GGC TTC TAG ACG TTT TGT ACT GAA T                                                        | IstR2 cloning into pHMB1            |
| pRNAFw       | AAT TCA TCG GCT CAG GGG ACT GGC CT                                                       | pRNA cloning into pHMB1             |
| pRNARv       | CTA GAG GCC AGT CCC CTG AGC CGA TG                                                       | pRNA cloning into pHMB1             |
| PsrDFw       | GGC TGA ATT CAT AGG CAT ATT TTT T                                                        | PsrD cloning into pHMB1             |
| PsrDRv       | GGC TTC TAG AAT TAA CTT TGT AAT G                                                        | PsrD cloning into pHMB1             |
| RnpBFw       | GGC TGA ATT CGA AGC TGA CCA GAC A                                                        | RnpB cloning into pHMB1             |
| RnpBRv       | GGC TTC TAG ACA AAA GCA AAA ACC C                                                        | RnpB cloning into pHMB1             |
| RttRFw       | GGC TGA ATT CAT CCC CCA CCA CCA T                                                        | RttR cloning into pHMB1             |
| RttRRv       | GGC TTC TAG ATT GCG GAT TCG CTT G                                                        | RttR cloning into pHMB1             |
| RybAFw       | GGC TGA ATT CAG CCT GTG CTA TAT C                                                        | RybA cloning into pHMB1             |
| RybARv       | GGC TTC TAG ATT TTC AGA CCA AAA C                                                        | RybA cloning into pHMB1             |
| RydBFw       | GGC TGA ATT CAC TAA TCG CAG TTT G                                                        | RydB cloning into pHMB1             |
| RydBRv       | GGC TTC TAG AAG AAA TAA GAA AAC C                                                        | RydB cloning into pHMB1             |
| RyeFFw       | GGC TGA ATT CAT TTT TAC CGT TGC A                                                        | RyeF cloning into pHMB1             |
| RyeFRv       | GGC TTC TAG AAG ATT CCT CTA ATT A                                                        | RyeF cloning into pHMB1             |
| RyfAFw       | GGC TGA ATT CAG CGG CCC TTT CCG C                                                        | RyfA cloning into pHMB1             |
| RyfARv       | GGC TTC TAG AGA CTT TAA ACA GAA T                                                        | RyfA cloning into pHMB1             |
| RyfBFw       | ACG TTA TTG AAG ATT TTG CTG                                                              | RyfB cloning into pHMB2             |
| RyfBRv       | GGC TTC TAG AAA GTT AAT TTA TAT A                                                        | RyfB cloning into pHMB2             |
| RyfDFw       | GGC TGA ATT CAA TCA AGA CGA TCC G                                                        | RyfD cloning into pHMB1             |
| RyfDRv       | GGC TTC TAG AAA GTG ATT GGG CAT C                                                        | RyfD cloning into pHMB1             |

|             |                                    |                           |
|-------------|------------------------------------|---------------------------|
| SroCFw      | GGC TGA ATT CAA GGC ACT GAA CTA A  | SroC cloning into pHMB1   |
| SroCRv      | GGC TTC TAG ACA GTC TAT AGA CAT A  | SroC cloning into pHMB1   |
| SroEFw      | GGC TGA ATT CAG TTC AGC AGG TTG A  | SroE cloning into pHMB1   |
| SroERv      | GGC TTC TAG ATG CCA CGT TTA TTC T  | SroE cloning into pHMB1   |
| SroGFw      | GGC TGA ATT CAG CTT ATT CTC AGG G  | SroG cloning into pHMB1   |
| SroGRv      | GGC TTC TAG AAT AGC CAA AAT AAC G  | SroG cloning into pHMB1   |
| SroHFw      | GGC TGA ATT CAG AAA ATA AGA ACA C  | SroH cloning into pHMB1   |
| SroHRv      | GGC TTC TAG ACA GCT TCC TCA GCC C  | SroH cloning into pHMB1   |
| SsrAFw      | GGC TGA ATT CAG GGG CTG ATT CTG G  | SsrA cloning into pHMB1   |
| SsrARv      | GGC TTC TAG ATC TGG TAA TCA CCG A  | SsrA cloning into pHMB1   |
| SsrSFw      | GGC TGA ATT CAG AAG ACA AAA TTT C  | SsrS cloning into pHMB1   |
| SsrSRv      | GGC TTC TAG ATC ATG GCT GGT GCC A  | SsrS cloning into pHMB1   |
| TffFw       | GGC TGA ATT CAT TTG TGG TAT AAA G  | Tff cloning into pHMB1    |
| TffRv       | GGC TTC TAG AGA AAC AGT TGC CAT G  | Tff cloning into pHMB1    |
| Tp2Fw       | GGC TGA ATT CAT AAT TTT TAC CAG A  | Tp2 cloning into pHMB1    |
| Tp2Rv       | GGC TTC TAG ATC GCG TCG CGA GAT G  | Tp2 cloning into pHMB1    |
| Tpke70Fw    | GGC TGA ATT CAA GGA AAA AAC CTT A  | Tpke70 cloning into pHMB1 |
| Tpke70Rv    | GGC TTC TAG AGC GCT CTA ACA AAG C  | Tpke70 cloning into pHMB1 |
| DicFER1Fw   | GGC TGA ATT CAT TTC TGG TGA CGT T  | DicF cloning into pHMB1   |
| DicFXb1Rv   | GGC TTC TAG AGC GCT CAG CCG CAT T  | DicF cloning into pHMB1   |
| DsrAER1Fw   | GGC TGA ATT CAA CAC ATC AGA TTT    | DsrA cloning into pHMB1   |
| DsrAXb1Rv   | GGC TTC TAG ATG AAG TGA ATC GTT G  | DsrA cloning into pHMB1   |
| FnrSER1Fw   | GGC TGA ATT CAG CAG GTG AAT GCA A  | FnrS cloning into pHMB1   |
| FnrSXb1Rv   | GGC TTC TAG AGG GTA GAC GCT GAT A  | FnrS cloning into pHMB1   |
| GadYER1Fw   | GGC TGA ATT CAC TGA GAG CAC AAA G  | GadY cloning into pHMB1   |
| GadYXb1Rv   | GGC TTC TAG AGA TTA TAG AGT TTT A  | GadY cloning into pHMB1   |
| GcvBER1Fw   | GGC TGA ATT CAC TTC CTG AGC CGG    | GcvB cloning into pHMB1   |
| GcvBXb1Rv   | GGC TTC TAG AGA TCA GTA ATT CGC G  | GcvB cloning into pHMB1   |
| IS118ER1Fw  | GGC TGA ATT CAG GTT CTG GAG GGG    | IS118 cloning into pHMB1  |
| IS118Xb1Rv  | GGC TTC TAG ATT AAT TTA TAA AAT A  | IS118 cloning into pHMB1  |
| MgrRER1Fw   | GGC TGA ATT CAG ATT CGT TAT CAG T  | MgrR cloning into pHMB1   |
| MgrRXb1Rv   | GGC TTC TAG AAA GGG GCC TGA TTT T  | MgrR cloning into pHMB1   |
| MicAbluntFw | AGA AAG ACG CGC ATT TGT T          | MicA cloning into pHMB2   |
| MicAXb1Rv   | GGC TTC TAG AGT GGC TGG AAA AAC A  | MicA cloning into pHMB2   |
| MicCER1Fw   | GGC TGA ATT CAG TTA TAT GCC TTT A  | MicC cloning into pHMB1   |
| MicCXb1Rv   | GGC TTC TAG ACT CTG GAT AAG GAT T  | MicC cloning into pHMB1   |
| MicFER1Fw   | GGC TGA ATT CAG CTA TCA TCA TTA A  | MicF cloning into pHMB1   |
| MicFXb1Rv   | GGC TTC TAG ATA ATG AAA AGT GTG T  | MicF cloning into pHMB1   |
| MicMER1Fw   | GGC TGA ATT CAC ACC GTC GCT TAA A  | MicM cloning into pHMB1   |
| MicMXb1Rv   | GGC TTC TAG AGG GAA TTT GCC GCA A  | MicM cloning into pHMB1   |
| OmrABER1Fw  | GGC TGA ATT CAC CCA GAG GTA TTG AT | OmrAB cloning into pHMB1  |
| OmrAXb1Rv   | GGC TTC TAG ACG CGA GCG ACA GTA A  | OmrA cloning into pHMB1   |
| OmrBXb1Rv   | GGC TTC TAG ATT ACT GTT ACA GAT T  | OmrB cloning into pHMB1   |
| OxySER1Fw   | GGC TGA ATT CAG AAA CGG AGC GGC A  | OxyS cloning into pHMB1   |
| OxySXb1Rv   | GGC TTC TAG AGC TTA TCG CCG GGC T  | OxyS cloning into pHMB1   |
| RprAER1Fw   | GGC TGA ATT CAC GGT TAT AAA TCA A  | RprA cloning into pHMB1   |
| RprAXb1Rv   | GGC TTC TAG ACG AGG TAG CGA AGC G  | RprA cloning into pHMB1   |
| RseXER1Fw   | GGC TGA ATT CAT TTT TAT TAT TCT GT | RseX cloning into pHMB1   |
| RseXXb1Rv   | GGC TTC TAG AAT CAG GCG CAC ATT A  | RseX cloning into pHMB1   |
| RybBER1Fw   | GGC TGA ATT CAC TGC TTT TCT TTG A  | RybB cloning into pHMB1   |
| RybBXb1Rv   | GGC TTC TAG AGC AGG GTA GTA GAT A  | RybB cloning into pHMB1   |
| RybDER1Fw   | GGC TGA ATT CAT ATC TGT AAT AAG    | RybD cloning into pHMB1   |
| RybDXb1Rv   | GGC TTC TAG ACA GCG AAA ATC ATC G  | RybD cloning into pHMB1   |
| RydCER1Fw   | GGC TGA ATT CAC TTC CGA TGT AGA C  | RydC cloning into pHMB1   |
| RydCXb1Rv   | GGC TTC TAG ACG TAA ACG TTC CTG A  | RydC cloning into pHMB1   |
| SpfER1Fw    | GGC TGA ATT CAG TAG GGT ACA GAG G  | Spf cloning into pHMB1    |
| SpfXb1Rv    | GGC TTC TAG AGC GCA TCA GGC ATT A  | Spf cloning into pHMB1    |
| SgrSER1Fw   | GGC TGA ATT CAG ATG AAG CAA GGG G  | SgrS cloning into pHMB1   |
| SgrSXb1Rv   | GGC TTC TAG AGT TCC CTT TTT AGC G  | SgrS cloning into pHMB1   |

|           |                                         |                           |
|-----------|-----------------------------------------|---------------------------|
| ArcZER1Fw | GGCCGAATTCGTGCGGCCTGAAAAAC              | ArcZ cloning into pHM-tac |
| ArcZXb1Rv | GGC TTC TAG AGA AAG CGT GGG TGG C       | ArcZ cloning into pHM-tac |
| GlmYER1Fw | CGGAATTC AGT GGC TCA TTC ACC GAC        | GlmY cloning into pHM-tac |
| GlmYXb1Rv | GCTCTAGA CAGTTGTCGT AATGAGCG            | GlmY cloning into pHM-tac |
| GlmZER1Fw | CGGAATTC GTA GAT GCT CAT TCC ATC        | GlmZ cloning into pHM-tac |
| GlmZXb1Rv | GCTCTAGA AATAACCCGC CACAGTAG            | GlmZ cloning into pHM-tac |
| PsrOER1Fw | CGGAATTC ATC TTC TGC GCA TCC TCG        | PsrO cloning into pHM-tac |
| PsrOXb1Rv | GCTCTAGA CGTCGTAAAC TGCTCGAC            | PsrO cloning into pHM-tac |
| RyhBER1Fw | CGGAATTC GCG ATC AGG AAG ACC C          | RyhB cloning into pHM-tac |
| RyhBXb1Rv | GCTCTAGA GTTATTTACA CCTTAGCGC           | RyhB cloning into pHM-tac |
| SdsRER1Fw | CGGAATTC GG CAAGGCAACT AAGC             | SdsR cloning into pHM-tac |
| SdsRXb1Rv | GCTCTAGA ATAAAGTCAG CGAAGG              | SdsR cloning into pHM-tac |
| RyeAER1Fw | CGGAATTC AAAGTCA GCGAAGGAAA TGC         | RyeA cloning into pHM-tac |
| RyeAXb1Rv | GCTCTAGA CTGAAAACT CTGTTAATTA CC        | RyeA cloning into pHM-tac |
| CyaRER1Fw | CCG GAA TTC GCT GAA AAA CAT AAC         | CyaR cloning into pHM-tac |
| CyaRXb1Rv | TGC TCT AGA TAG AAA CAG GAA GCC         | CyaR cloning into pHM-tac |
| Och1Fw    | GGCT GAATTC ATG CCT TTG GTA GAG GAA     | Och1 cloning into pHMB1   |
| Och1Rv    | GGCT TCTAGA CGC TCT TTA ATT GTT AAT     | Och1 cloning into pHMB1   |
| Och2Fw    | GGC TGA ATT CAT GCG CAT CAG TAA TAA A   | Och2 cloning into pHMB1   |
| Och2Rv    | GGCT TCTAGA CGC GTT TGC ATC GTC GTC     | Och2 cloning into pHMB1   |
| Och3Fw    | GCT GAA TTC ATA TAT AAT TTA TAT TAT TC  | Och3 cloning into pHMB1   |
| Och3Rv    | GGCT TCTAGA ATT TGC CGA CCC CGA GCA     | Och3 cloning into pHMB1   |
| Och4Fw    | GGC TGA ATT CAC GAT ATA TGT TTA TTT T   | Och4 cloning into pHMB1   |
| Och4Rv    | GGCT TCTAGA TTG TAA TGA AGT CAC TTA     | Och4 cloning into pHMB1   |
| Och5Fw    | GGC TGA ATT CAT CCT TGT CCG CTT AAC C   | Och5 cloning into pHMB1   |
| Och5Rv    | GGCT TCTAGA CAA CCC GCT AAA ACA CCT     | Och5 cloning into pHMB1   |
| Och6Fw    | GGC TGA ATT CAG CGC CTT GAA AAG AGG C   | Och6 cloning into pHMB1   |
| Och6Rv    | GGCT TCTAGA TAA GCA AAA GTG ATT TAT     | Och6 cloning into pHMB1   |
| Och7Fw    | GGC TGA ATT CAG GTG AGC ACT GAA CAA T   | Och7 cloning into pHMB1   |
| Och7Rv    | GGCT TCTAGA GAA TGA TTT AGG CGG TTC     | Och7 cloning into pHMB1   |
| Och8Fw    | GGCT GAATTC ACA CGA TCA CTC TAA GAG     | Och8 cloning into pHMB1   |
| Och8Rv    | GGCT TCTAGA AGA CCA TTA AAC AGC CTG     | Och8 cloning into pHMB1   |
| Och9Fw    | GGC TGA ATT CAC CAT CGT GCA AAA GGG C   | Och9 cloning into pHMB1   |
| Och9Rv    | GGCT TCTAGA TCC AAA GGT CAT TGC ACC     | Och9 cloning into pHMB1   |
| Och10Fw   | GGCT GAATTC ATA CTA GCC ACT GAA AAT     | Och10 cloning into pHMB1  |
| Och10Rv   | GGCT TCTAGA AGC AGA GTA TGA CTA AAA     | Och10 cloning into pHMB1  |
| C0343 NP  | GTC AGG CAT GGG TTG CGG GCG AGG         | Northern probe for C0343  |
| C0362 NP  | GAC AAA CGC AAC ATT GCG TGA TGC         | Northern probe for C0362  |
| CsrB NP   | GCC TTT CCC TGA AAC ACC ATC CTG G       | Northern probe for CsrB   |
| CsrC NP   | GAT TCC ATT TCC GTT TAA TTA CGT CT      | Northern probe for CsrC   |
| CyaR NP   | GGT TCC TGG TAC AGC TAG CAT TTT ATG     | Northern probe for CyaR   |
| DsrA NP   | GTT ACA CCA GGA AAT CTG ATG TGT T       | Northern probe for DsrA   |
| FnrS NP   | GGA AGT AAG ACA ATA TGG AGC GCA A       | Northern probe for FnrS   |
| GadY NP   | GAG GAT AGT CTG CCG TCT CCA GAC TAA TAA | Northern probe for GadY   |
| GcvB NP   | GCA TTC CGA TAA AAC TTT TCG TTC C       | Northern probe for GcvB   |
| IsrB NP   | GAA CAT ACT TTT CAG GAT TTT GCG C       | Northern probe for IsrB   |
| IstR-1 NP | GCA AAG CAC ACT GTA TTA TGT CAA C       | Northern probe for IstR-1 |
| IstR-2 NP | GCA CGA ATT TTG ACG TAT TTA GTG C       | Northern probe for IstR-2 |
| MgrR NP   | GTA AAC CGG CGG TGA ATG CTT GCA T       | Northern probe for MgrR   |
| OmrA NP   | AGA GCG TAC CGA ATA ATC TCA CCA A       | Northern probe for OmrA   |
| OmrB NP   | GCT CAA CCC GAA GTT GAC TTC ACC T       | Northern probe for OmrB   |
| OxyS NP   | GAA ACG GGC AGT GAC TTC AAG GGT         | Northern probe for OxyS   |
| PsrO NP   | GCT GAC GGC AGC AAT TCA CTG GAA A       | Northern probe for PsrO   |
| RseX NP   | GAT AAA AGG CTA ATA ACG GAA GCA T       | Northern probe for RseX   |
| RttR NP   | GCA GAA TAT TTA ATT GCG GAT TCG T       | Northern probe for RttR   |
| RybB NP   | ATG GGG ACA TCA AAG AAA AGC AGT         | Northern probe for RybB   |
| SdsR NP   | GGC TCT TGG GAG AGA GCC GTC G           | Northern probe for SdsR   |
| RyeF NP   | GAA TAT GAT TTA TTA CAA TGT AAT CAT T   | Northern probe for RyeF   |
| RyhB NP   | GCA ATG TCG TGC TTT CAG GTT CTC         | Northern probe for RyhB   |

|                  |                                                                        |                          |
|------------------|------------------------------------------------------------------------|--------------------------|
| SokX_NP          | TGA GGC CAG CGT TCG AAC CCA AA                                         | Northern probe for SokX  |
| Spf_NP           | GAA GTA AAA GGT CTG AAA GAT AGA A                                      | Northern probe for Spf   |
| Och10_NP         | GAT CCT CGG AAG GGG AAG TTG ATT A                                      | Northern probe for Och10 |
| $\Delta$ arcZFW  | TACGCATCACACATTTAACTGATTCATGTAACAAAT<br>CATTTAAGTTGTAGGCTGGAGCTGCTTCG  | <i>arcZ</i> knockout     |
| $\Delta$ arcZRV  | GCTAGACCGGGGTGCGCGAATACTGCGCCAACAC<br>CAGGAAATCTTCCGGGGATCCGTCGACC     | <i>arcZ</i> knockout     |
| $\Delta$ csrBFW  | TGTAAGCGCCTTGTAAAGACTTCGCGAAAAAGACGA<br>TTCTATCTTCTGTAGGCTGGAGCTGCTTCG | <i>csrB</i> knockout     |
| $\Delta$ csrBRV  | GTATTCACAGCGCTCCCGGTTTCGTTTCGCAGCATT<br>CCAGCTACTTTTCCGGGGATCCGTCGACC  | <i>csrB</i> knockout     |
| $\Delta$ csrCFW  | TGGCGGTTGATTGTTTGTAAAGCAAAGGCGTAA<br>AGTAGCACCTGTAGGCTGGAGCTGCTTCG     | <i>csrC</i> knockout     |
| $\Delta$ csrCRV  | GATTTGCGGCGGAATCTAACAGAAAGCAAGCAAA<br>GAAAAAAGGCGTTCCGGGGATCCGTCGACC   | <i>csrC</i> knockout     |
| $\Delta$ cyaRFW  | AACCGATCACATACAGCTGCATTTATTAAGGTTAT<br>CATCCGTTTCTGTAGGCTGGAGCTGCTTCG  | <i>cyaR</i> knockout     |
| $\Delta$ cyaRRV  | GGACGTGACCAGAAATAAATCCTTTATTTTCATTGT<br>ATTACGCGTTTCCGGGGATCCGTCGACC   | <i>cyaR</i> knockout     |
| $\Delta$ dicFFW  | ATACGCTTAAGTGACAACCCCGCTGCAACGCCCT<br>CTGTTATCAATTGTAGGCTGGAGCTGCTTCG  | <i>dicF</i> knockout     |
| $\Delta$ dicFRV  | GTGCGCTCAGCCGCATTACCACATCACAAAATTC<br>ACTTTAAAAATCCGGGGATCCGTCGACC     | <i>dicF</i> knockout     |
| $\Delta$ dsrAFW  | GGGTGACGTGCGTCACATTTCTATTATAAGTAGC<br>GTTAATCATTTCGGGGATCCGTCGACC      | <i>dsrA</i> knockout     |
| $\Delta$ dsrARV  | ATAAAAAAATCCCGACCCTGAGGGGGTCCGGATG<br>AAACTTGCTTATGTAGGCTGGAGCTGCTTCG  | <i>dsrA</i> knockout     |
| $\Delta$ fnrSFW  | GCGAAGTCAATAAACTCTTACCCATTCCAGGGCAA<br>TATCTCTCTTTGTAGGCTGGAGCTGCTTCG  | <i>fnrS</i> knockout     |
| $\Delta$ fnrSRV  | TCATTGGGTGGACTCTTAAAGGGTAGACGCTGATA<br>AATAACAGGCTTCCGGGGATCCGTCGACC   | <i>fnrS</i> knockout     |
| $\Delta$ gadYFW  | AAAAAATGGCTGATCTTATTTCCAGTAAAAGTTAT<br>ATTTAACTTTGTAGGCTGGAGCTGCTTCG   | <i>gadY</i> knockout     |
| $\Delta$ gadYRV  | AGGGGACCGGAAGAGGATAGTCTGCCGTCTCCA<br>GACTAATAAACTTCCGGGGATCCGTCGACC    | <i>gadY</i> knockout     |
| $\Delta$ gcvBFW  | AAATTGTCCGTTGAGCTTCTACCAGCAAATACCTA<br>TAGTGCGGCTGTAGGCTGGAGCTGCTTCG   | <i>gcvB</i> knockout     |
| $\Delta$ gcvBRV  | GATCGCAAGGTAATAAAGCACCAGCAATTAGGC<br>GGTGCTACATTTCCGGGGATCCGTCGACC     | <i>gcvB</i> knockout     |
| $\Delta$ glmYFW  | CCAACTATTTTCTTTATTTGGCACAGTTACTGCATA<br>ATAGTAACCTGTAGGCTGGAGCTGCTTCG  | <i>glmY</i> knockout     |
| $\Delta$ glmYRV  | GAATAGCCTGATGCTAACCGAGGGGAAGTTCAGA<br>TACAACAAAGCTTCCGGGGATCCGTCGACC   | <i>glmY</i> knockout     |
| $\Delta$ IS118FW | AGTTAGTATATGTATCTATCACTGTTGATGATAATA<br>TCAGCACTTTGTAGGCTGGAGCTGCTTCG  | <i>IS118</i> knockout    |
| $\Delta$ IS118RV | AATTGCGCGCAATCATGGCGCGCACAAGCTATA<br>ATACCAACCTATTCCGGGGATCCGTCGACC    | <i>IS118</i> knockout    |
| $\Delta$ mcaSFW  | TGAAGAAAATTGGCAACTAAAGGTTAAACCGTTA<br>TAACACAGTCTGTAGGCTGGAGCTGCTTCG   | <i>mcaS</i> knockout     |
| $\Delta$ mcaSRV  | CATAAAAAAATAGAGTCTGTCGACATCCGCCAGAC<br>TCTACAGTACTTCCGGGGATCCGTCGACC   | <i>mcaS</i> knockout     |
| $\Delta$ micAFW  | TAAAAATTTTCTGAACCTTTTCTCCAGGCGAGTC<br>TGAGTATATTGTAGGCTGGAGCTGCTTCG    | <i>micA</i> knockout     |
| $\Delta$ micARV  | AAGAAAAAGGCCACTCGTGAGTGGCCAAAATTTCA<br>TCTCTGAATTTTCCGGGGATCCGTCGACC   | <i>micA</i> knockout     |
| $\Delta$ micCFW  | AAATAAAAATTATACTTTTAAATTTGCTATACGTTATT<br>CTGCGCGGTGTAGGCTGGAGCTGCTTCG | <i>micC</i> knockout     |
| $\Delta$ micCRV  | CTGGATAAGGATTATCCAATTTCTAAAAAAGGCC<br>CGGACGACTGTTCCGGGGATCCGTCGACC    | <i>micC</i> knockout     |

|                 |                                                                       |                      |
|-----------------|-----------------------------------------------------------------------|----------------------|
| $\Delta micMFw$ | CCTAAGAGTATTGGCAGGATGGTGAGATTGAGCG<br>ACAATCGAGTTTGTAGGCTGGAGCTGCTTCG | <i>micM</i> knockout |
| $\Delta micMRv$ | TGGCCAATATCGCTATTGGCCCGTCAAAGAGGAAT<br>TTCATTTTTTTCCGGGGATCCGTCGACC   | <i>micM</i> knockout |
| $\Delta omrAFw$ | GTTTTCTCGCTGGCGAAGAGTCGTCGTGCAGACC<br>ACAATCAAGATTGTAGGCTGGAGCTGCTTCG | <i>omrA</i> knockout |
| $\Delta omrARv$ | TAAAGAACGCGAGCGACAGTAAATTAGGTGCGAA<br>AAAAAACCTGCTTCCGGGGATCCGTCGACC  | <i>omrA</i> knockout |
| $\Delta omrBFw$ | ATTGACCGCTGGTGGCGTTTGGCTTCAGGTTGCT<br>AAAGTGGTGATTGTAGGCTGGAGCTGCTTCG | <i>omrB</i> knockout |
| $\Delta omrBRv$ | CGAGGTGTGTAATTGTCGGTACTGTTACAGATT<br>GATGACCGGCTTCCGGGGATCCGTCGACC    | <i>omrB</i> knockout |
| $\Delta oxySFw$ | TGAACGATTATCCCTATCAAGCATTCTGACTGATA<br>ATTGCTCACATGTAGGCTGGAGCTGCTTCG | <i>oxyS</i> knockout |
| $\Delta oxySRv$ | AAATTTGAGCCTGGCTTATCGCCGGGCTTTTTAT<br>GGCAAAAAAATCCGGGGATCCGTCGACC    | <i>oxyS</i> knockout |
| $\Delta rdlBFw$ | CGAGCGTCATATAGCCGCTTGTGTAAATGACAAC<br>ATTTTGC GGCTGTAGGCTGGAGCTGCTTCG | <i>rdlB</i> knockout |
| $\Delta rdlBRv$ | AATGTTGCGGGGGCTTTATCCCTGGTGGCATTGG<br>TTGCTGGAAAGTCCGGGGATCCGTCGACC   | <i>rdlB</i> knockout |
| $\Delta rdlCFw$ | CGAGCGTCATATAGCCGCTTGTGTAAATGACAAC<br>ATTTTGC GGCTGTAGGCTGGAGCTGCTTCG | <i>rdlC</i> knockout |
| $\Delta rdlCRv$ | CGCAATGTTGCGGGGGCTTTATCCCTGGTGGCATT<br>GGTTGCTGGAATTCCGGGGATCCGTCGACC | <i>rdlC</i> knockout |
| $\Delta rprAFw$ | CATTCAGCTGGTAGTACCTGTCGCAAATCCTTAC<br>AGTTTTTGTAGGCTGGAGCTGCTTCG      | <i>rprA</i> knockout |
| $\Delta rprARv$ | TCAGCCTGCTGACGGCTTGAAGAGAGTCACAGTA<br>TCTTGTGCAACTTCCGGGGATCCGTCGACC  | <i>rprA</i> knockout |
| $\Delta rseXFw$ | ATTAATTCATTTAATCAATATATTAGCACTGATTACA<br>ATTATACCTGTAGGCTGGAGCTGCTTCG | <i>rseX</i> knockout |
| $\Delta rseXRv$ | TGCGCCAAACGGCTGGTGTGATCAGGCGCACATT<br>AATGAAGGCATTCCGGGGATCCGTCGACC   | <i>rseX</i> knockout |
| $\Delta rybBFw$ | ACAACCGCAGAACTTTTCCGCAGGGCATCAGTCTT<br>AATTAGTGCCTGTAGGCTGGAGCTGCTTCG | <i>rybB</i> knockout |
| $\Delta rybBRv$ | AAGTTTTAGATAACAAAAAACCATCAACCTTGAAC<br>CGAAATGGCTTCCGGGGATCCGTCGACC   | <i>rybB</i> knockout |
| $\Delta rydCFw$ | CAAGGATTATGGTTTTATTTATCATACAAATAAATA<br>TAATAGGCGTGTAGGCTGGAGCTGCTTCG | <i>rydC</i> knockout |
| $\Delta rydCRv$ | ATTTAAAGAAAACGCCTGTACTAAAACCGACCCGT<br>GGTACAGGCGTTCCGGGGATCCGTCGACC  | <i>rydC</i> knockout |
| $\Delta sdsRFw$ | AAAACGCTGGACTCAGACAGTAGAGTGTGTGTTAT<br>GGTTGACTATTGTAGGCTGGAGCTGCTTCG | <i>sdsR</i> knockout |
| $\Delta sdsRRv$ | TAAAATAGCCTTTTGAATTTCCAATAAAAAAACCGCC<br>TCAGTTCTTTTCCGGGGATCCGTCGACC | <i>sdsR</i> knockout |
| $\Delta ryeFFw$ | GAAATGAAAGGAATCATTGAACGCCATCAGGCCAA<br>ATGATTTTTATGTAGGCTGGAGCTGCTTCG | <i>ryeF</i> knockout |
| $\Delta ryeFRv$ | AAAAACAATAACCCAATGCGTTTTTCCCTCGCATA<br>GATTCCTCTTTCCGGGGATCCGTCGACC   | <i>ryeF</i> knockout |
| $\Delta ryfAFw$ | CAAGCAAAGAGAGTTATTATTGTTCTGTTAGTGT<br>TTATCCACTTGTAGGCTGGAGCTGCTTCG   | <i>ryfA</i> knockout |
| $\Delta ryfARv$ | GCCGCCAAAGGGCGGCATTCCGGGCTTACTTGCT<br>GCTCTGAAGGTTTCCGGGGATCCGTCGACC  | <i>ryfA</i> knockout |
| $\Delta ryfBFw$ | AAGATTAACGTGACCGCCAATTCGTAAGTACATTA<br>AAATTGGCTTTGTAGGCTGGAGCTGCTTCG | <i>ryfB</i> knockout |
| $\Delta ryfBRv$ | TCACTAAGTTAATTTATATAGTATCTGCCAGACAC<br>TTATTTATATTCCGGGGATCCGTCGACC   | <i>ryfB</i> knockout |
| $\Delta ryfDFw$ | CCACCGTTCGTATGGCAAGTTTCATTTGGCTGATA<br>TAACCTAAAGTGTAGGCTGGAGCTGCTTCG | <i>ryfD</i> knockout |
| $\Delta ryfDRv$ | CTACTGGAGATTAATGAGGTCATCCCTCAATTAT<br>TCAAGGTTATTTCCGGGGATCCGTCGACC   | <i>ryfD</i> knockout |

|            |                                                                       |                                                  |
|------------|-----------------------------------------------------------------------|--------------------------------------------------|
| ΔryhBFw    | AAAAAGTGTGGACAAGTGCGAATGAGAATGATTA<br>TTATTGTCTCTGTAGGCTGGAGCTGCTTCG  | <i>ryhB</i> knockout                             |
| ΔryhBRv    | AACACAAGCACTCCCGTGGATAAATTGAGAACGAA<br>AGATCAAAAATTCCGGGGATCCGTCGACC  | <i>ryhB</i> knockout                             |
| ΔsgrSFw    | TTCCCTATATTAAGTCAATAATTCCTAACGATGAAG<br>CAAGGGGGTTGTAGGCTGGAGCTGCTTCG | <i>sgrS</i> knockout                             |
| ΔsgrSRv    | CGTCATTATCCAGATCATACGTTCCCTTTTAGCG<br>CGGCGAGAATTTCCGGGGATCCGTCGACC   | <i>sgrS</i> knockout                             |
| ΔsroCFw    | GCACTGTTCAAAGAACCGAATGACAAGGCACTGA<br>ACTAATTACAATGTAGGCTGGAGCTGCTTCG | <i>sroC</i> knockout                             |
| ΔsroCRv    | GTAATAAATAACCCAGTTCAGTCTATAGACATA<br>AATCTACTCCTCCGGGGATCCGTCGACC     | <i>sroC</i> knockout                             |
| Δoch5Fw    | TTGCGCATCTTTTCGAAATAAAAATGTCCATCCCC<br>CTCCCCGCTGTAGGCTGGAGCTGCTTCG   | <i>och5</i> knockout                             |
| Δoch5Rv    | GTAGCCCGACGTATTCTCGGGCTAATGCCTTTAC<br>CCGATATTGCTTCCGGGGATCCGTCGACC   | <i>och5</i> knockout                             |
| T7-csgDFw  | TAATACGACTCACTATAGGGCAGATGTAATCCATT<br>AGTTT                          | <i>csgD</i> 5'-UTR <i>in vitro</i> transcription |
| csgDRv     | GACTTCATTAACATGATGAAACCC                                              | <i>csgD</i> 5'-UTR <i>in vitro</i> transcription |
| T7-flhDFw  | TAATACGACTCACTATAGGGGATTTAGGAAAAATC<br>TTAGA                          | <i>flhD</i> 5'-UTR <i>in vitro</i> transcription |
| flhDRv     | CTCGGAGGTATGCATTATCCACC                                               | <i>flhD</i> 5'-UTR <i>in vitro</i> transcription |
| T7-och5Fw  | TAATACGACTCACTATAGGGATCCTTGCCGCTTA<br>ACCGTT                          | <i>Och5</i> <i>in vitro</i> transcription        |
| och5Rv     | AATAATATTTGTAGCCCGACGTATTC                                            | <i>Och5</i> <i>in vitro</i> transcription        |
| T7-dicFFw  | TAATACGACTCACTATAGGGTTTCTGGTGACGTTT<br>GGCGG                          | <i>DicF</i> <i>in vitro</i> transcription        |
| dicF5Rv    | GGGCGGCAGAGCAGTC                                                      | <i>DicF</i> <i>in vitro</i> transcription        |
| T7-omrAFw  | TAATACGACTCACTATAGGGCCCAGAGGTATTGAT<br>TGGTG                          | <i>OmrA</i> <i>in vitro</i> transcription        |
| omrARv     | AAAAAAAACCTGCGCATCCGC                                                 | <i>OmrA</i> <i>in vitro</i> transcription        |
| T7-omrBFw  | TAATACGACTCACTATAGGGCCCAGAGGTATTGAT<br>AGGTGA                         | <i>OmrB</i> <i>in vitro</i> transcription        |
| omrBRv     | AAAAAAAACCTGCGCATCTGCG                                                | <i>OmrB</i> <i>in vitro</i> transcription        |
| T7-rprAFw  | TAATACGACTCACTATAGGGACGTTATAAATCAA<br>CATATTGATTTATAAG                | <i>RprA</i> <i>in vitro</i> transcription        |
| rprARv     | AAAAAAGCCCATCGTGGGAG                                                  | <i>RprA</i> <i>in vitro</i> transcription        |
| T7-ssrSFw  | TAATACGACTCACTATAGGGATTTCTCTGAGATGT<br>TCGCAAGC                       | <i>6S</i> <i>in vitro</i> transcription          |
| ssrSRv     | GAATCTCCGAGATGCCGC                                                    | <i>6S</i> <i>in vitro</i> transcription          |
| T7-sdsRFw  | TAATACGACTCACTATAGGGCAAGGCAACTAAGCC<br>TGCAT                          | <i>SdsR</i> <i>in vitro</i> transcription        |
| sdsRRv     | AAAAAGAGACCGAACACGATTCCTG                                             | <i>SdsR</i> <i>in vitro</i> transcription        |
| T7-IS118Fw | TAATACGACTCACTATAGGGGGTTCTGGAGGGGG<br>TTTG                            | <i>IS118</i> <i>in vitro</i> transcription       |
| IS118Rv    | AAATTGCGCGCCAATCATGG                                                  | <i>IS118</i> <i>in vitro</i> transcription       |
| T7-sgrSFw  | TAATACGACTCACTATAGGGGATGAAGCAAGGGG<br>GTGC                            | <i>SgrS</i> <i>in vitro</i> transcription        |
| sgrSRv     | AAAAAAAACCAGCAGGTATAATCTGC                                            | <i>SgrS</i> <i>in vitro</i> transcription        |

## Supplementary Figures

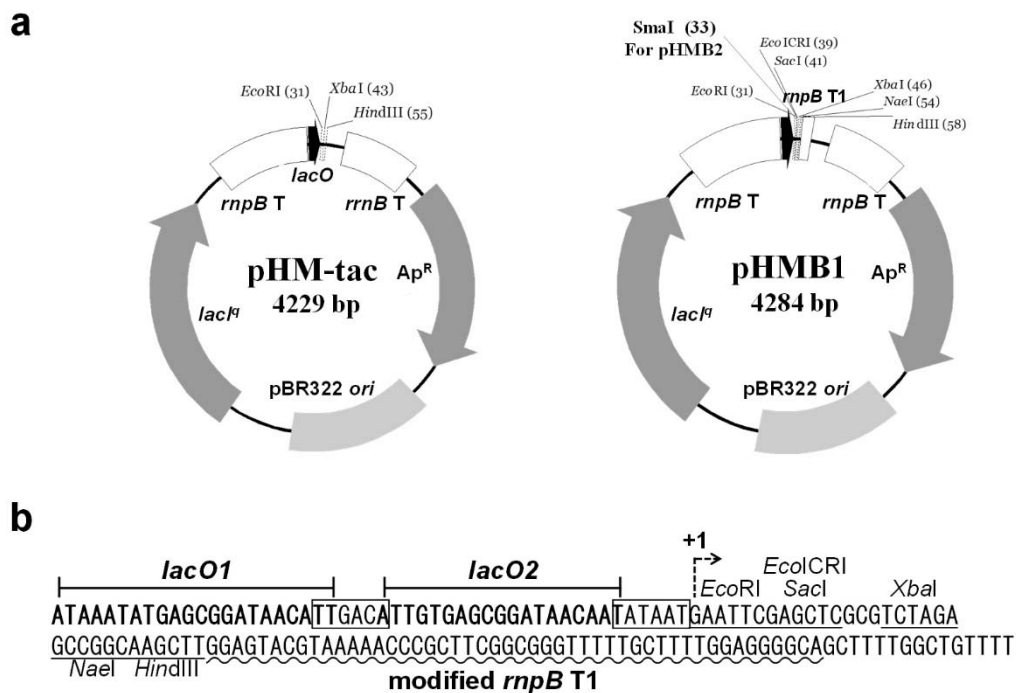

**Supplementary Figure 1. sRNA expression vectors pHM-tac and pHMB1.** (a) Schematic view of plasmids pHM-tac and pHMB1 containing the pBR322 replication origin, ampicillin resistance gene, and the *tacO* promoter, which is tightly controlled by the *lacI<sup>q</sup>* gene on plasmids and induced by IPTG. pHMB1 was constructed by adding the modified *rnpB* T1 terminator in the region downstream of the multiple cloning site (MCS) of pHM-tac. pHMB2, a derivative of pHMB1, has the *Sma*I cloning site instead of *Eco*RI. (b) Schematic structure of the transcription unit region of the pHMB1 vector. Lac operator sequences are shown in bold, and designated *lacO1* and *lacO2*. The putative transcription start site is indicated with an arrow, and the -35 and -10 regions of the *tac* promoter with boxes. Unique recognition sites for each restriction enzyme in MCS are underlined.



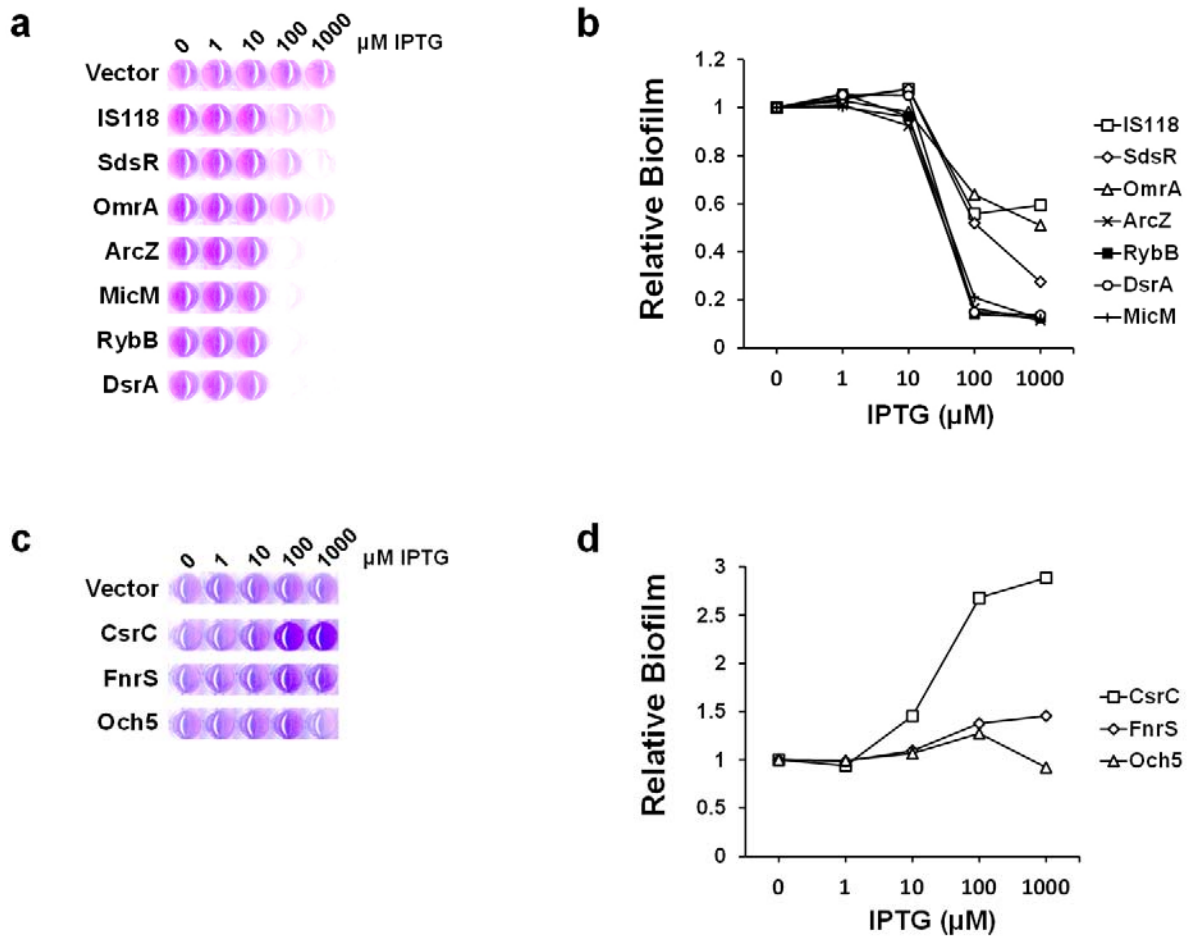

**Supplementary Figure 2. Dosage effects of sRNAs on biofilm formation.** (a, c) *E. coli* MG1655 strains containing each sRNA-expressing plasmid were grown in LB complemented with different IPTG concentrations at 30°C for 12 h. The biofilm attached to 96-well round bottom polystyrene microtiter plates was determined by crystal violet staining and dissolved with 30% acetic acid. (b, d) The level of biofilm formation of each strain ( $OD_{550}/OD_{595}$ ) was normalized to the level of the condition with no IPTG, and termed 'relative biofilm'.

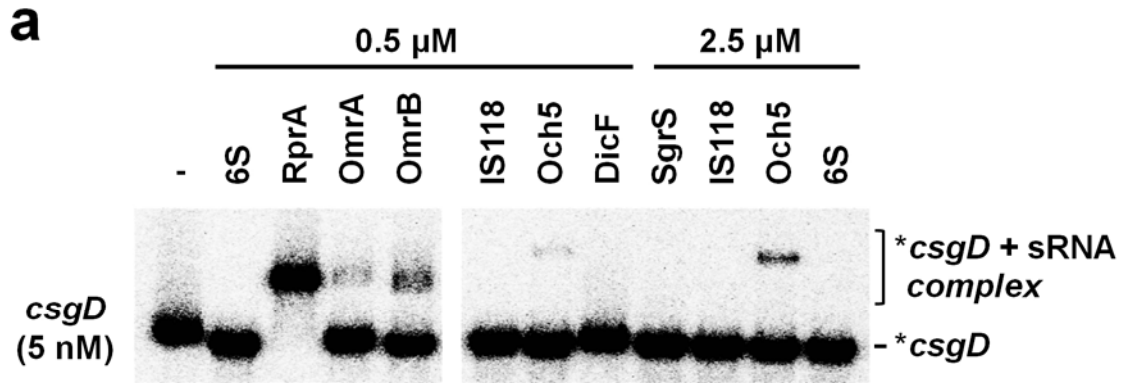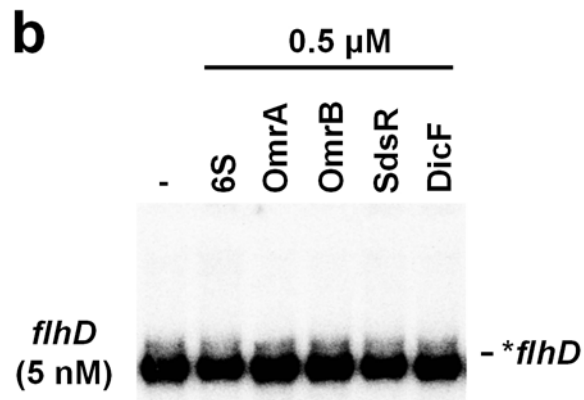

**Supplementary Figure 3. Binding assay of sRNAs with *flhD* or *csgD* 5'-UTR RNA.**  $^{32}$ P-labeled 5'-UTR RNA (5 nM) was incubated at 25°C for 20 min with sRNAs (0.5 or 2.5  $\mu$ M) in TMN binding buffer. After incubation, samples were separated on 5% non-denaturing polyacrylamide gels at 4°C. *csgD* 5'-UTR RNA (a) and *flhD* 5'-UTR RNA (b). 6S RNA was used as negative control. Asterisks indicate  $^{32}$ P 5'-end labeled RNA species.

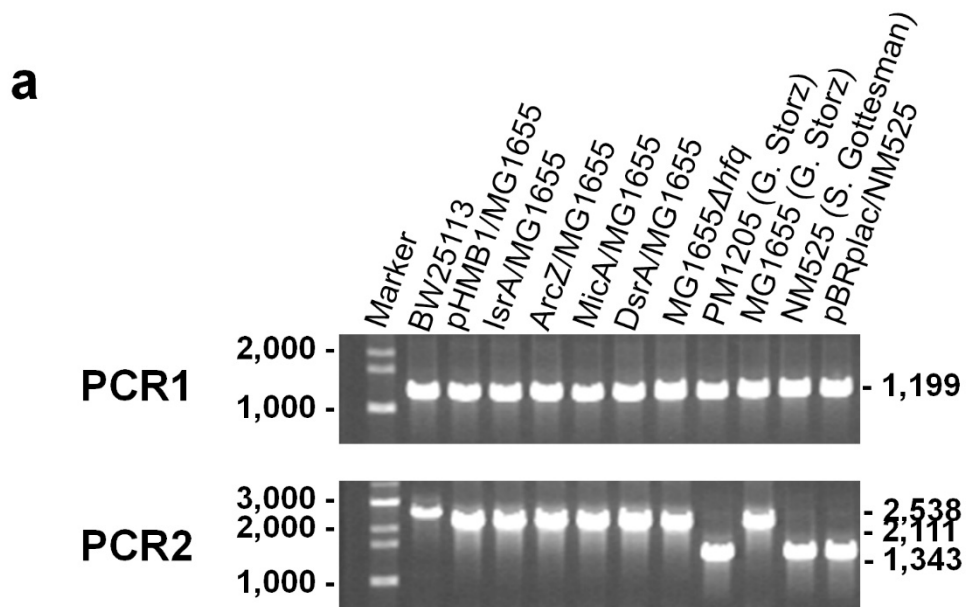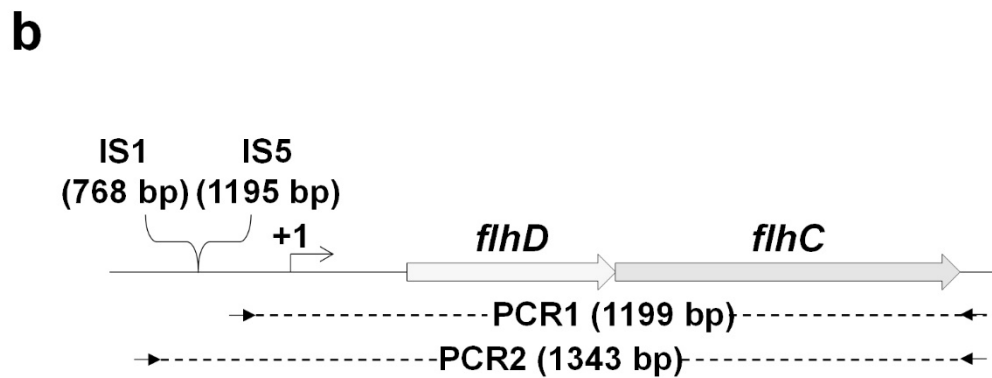

**Supplementary Figure 4. PCR for detecting IS elements upstream of the *flhDC* operon.** (a) Two amplified products were generated from chromosomal DNA of several *E. coli* strains. The 2,111 bp and 2,538 bp (bottom panel) products signify insertion of the IS1 or IS5 element, respectively. (b) Schematic view of the amplified region. The transcription start site of the *flhDC* operon is designated +1. Primer positions are indicated with arrows, and the expected PCR products (PCR1 and 2) with dashed lines.

## Supplementary References

1. Argaman, L. *et al.* Novel small RNA-encoding genes in the intergenic regions of *Escherichia coli*. *Curr Biol* **11**, 941–950 (2001).
2. Wassarman, K. M., Repoila, F., Rosenow, C., Storz, G. & Gottesman, S. Identification of novel small RNAs using comparative genomics and microarrays. *Genes Dev* **15**, 1637–1651 (2001).
3. Papenfort, K. *et al.* Specific and pleiotropic patterns of mRNA regulation by ArcZ, a conserved, Hfq-dependent small RNA. *Mol Microbiol* **74**, 139–158 (2009).
4. Mandin, P. & Gottesman, S. Integrating anaerobic/aerobic sensing and the general stress response through the ArcZ small RNA. *EMBO J* **29**, 3094–3107 (2010).
5. De Lay, N. & Gottesman, S. A complex network of small non-coding RNAs regulate motility in *Escherichia coli*. *Mol Microbiol* (2012). doi:10.1111/j.1365-2958.2012.08209.x
6. Tjaden, B. *et al.* Transcriptome analysis of *Escherichia coli* using high-density oligonucleotide probe arrays. *Nucleic Acids Res* **30**, 3732–3738 (2002).
7. Rivas, E., Klein, R. J., Jones, T. A. & Eddy, S. R. Computational identification of noncoding RNAs in *E. coli* by comparative genomics. *Curr Biol* **11**, 1369–1373 (2001).
8. Liu, M. Y. *et al.* The RNA molecule CsrB binds to the global regulatory protein CsrA and antagonizes its activity in *Escherichia coli*. *J Biol Chem* **272**, 17502–17510 (1997).
9. Weilbacher, T. *et al.* A novel sRNA component of the carbon storage regulatory system of *Escherichia coli*. *Mol Microbiol* **48**, 657–670 (2003).
10. Johansen, J., Eriksen, M., Kallipolitis, B. & Valentin-Hansen, P. Down-regulation of outer membrane proteins by noncoding RNAs: unraveling the cAMP-CRP- and sigmaE-dependent CyaR-ompX regulatory case. *J Mol Biol* **383**, 1–9 (2008).
11. De Lay, N. & Gottesman, S. The Crp-activated small noncoding regulatory RNA CyaR (RyeE) links nutritional status to group behavior. *J Bacteriol* **191**, 461–476 (2009).
12. Bouche, F. & Bouche, J. P. Genetic evidence that DicF, a second division inhibitor encoded by the *Escherichia coli* dicB operon, is probably RNA. *Mol Microbiol* **3**, 991–994 (1989).
13. Faubladiet, M., Cam, K. & Bouche, J. P. *Escherichia coli* cell division inhibitor DicF-RNA of the dicB operon. Evidence for its generation in vivo by transcription termination and by RNase III and RNase E-dependent processing. *J Mol Biol* **212**, 461–471 (1990).
14. Tetart, F. & Bouche, J. P. Regulation of the expression of the cell-cycle gene *ftsZ* by DicF antisense RNA. Division does not require a fixed number of FtsZ molecules. *Mol Microbiol* **6**, 615–620 (1992).
15. Sledjeski, D. & Gottesman, S. A small RNA acts as an antisilencer of the H-NS-silenced *rcaA* gene of *Escherichia coli*. *Proc Natl Acad Sci U S A* **92**, 2003–2007 (1995).

16. Sledjeski, D. D., Gupta, A. & Gottesman, S. The small RNA, DsrA, is essential for the low temperature expression of RpoS during exponential growth in *Escherichia coli*. *EMBO J* **15**, 3993–4000 (1996).
17. Majdalani, N., Cuning, C., Sledjeski, D., Elliott, T. & Gottesman, S. DsrA RNA regulates translation of RpoS message by an anti-antisense mechanism, independent of its action as an antisilencer of transcription. *Proc Natl Acad Sci U S A* **95**, 12462–12467 (1998).
18. Lease, R. A. & Belfort, M. A trans-acting RNA as a control switch in *Escherichia coli*: DsrA modulates function by forming alternative structures. *Proc Natl Acad Sci U S A* **97**, 9919–9924 (2000).
19. Saetrom, P. *et al.* Predicting non-coding RNA genes in *Escherichia coli* with boosted genetic programming. *Nucleic Acids Res* **33**, 3263–3270 (2005).
20. Ribes, V., Romisch, K., Giner, A., Dobberstein, B. & Tollervey, D. E. coli 4.5S RNA is part of a ribonucleoprotein particle that has properties related to signal recognition particle. *Cell* **63**, 591–600 (1990).
21. Poritz, M. A. *et al.* An E. coli ribonucleoprotein containing 4.5S RNA resembles mammalian signal recognition particle. *Science (80-. )*. **250**, 1111–1117 (1990).
22. Durand, S. & Storz, G. Reprogramming of anaerobic metabolism by the FnrS small RNA. *Mol Microbiol* **75**, 1215–1231 (2010).
23. Boysen, A., Moller-Jensen, J., Kallipolitis, B., Valentin-Hansen, P. & Overgaard, M. Translational regulation of gene expression by an anaerobically induced small non-coding RNA in *Escherichia coli*. *J Biol Chem* **285**, 10690–10702 (2010).
24. Chen, S. *et al.* A bioinformatics based approach to discover small RNA genes in the *Escherichia coli* genome. *Biosystems* **65**, 157–177 (2002).
25. Opdyke, J. A., Kang, J. G. & Storz, G. GadY, a small-RNA regulator of acid response genes in *Escherichia coli*. *J Bacteriol* **186**, 6698–6705 (2004).
26. Tramonti, A., De Canio, M. & De Biase, D. GadX/GadW-dependent regulation of the *Escherichia coli* acid fitness island: transcriptional control at the gadY-gadW divergent promoters and identification of four novel 42 bp GadX/GadW-specific binding sites. *Mol Microbiol* **70**, 965–982 (2008).
27. Urbanowski, M. L., Stauffer, L. T. & Stauffer, G. V. The gcvB gene encodes a small untranslated RNA involved in expression of the dipeptide and oligopeptide transport systems in *Escherichia coli*. *Mol Microbiol* **37**, 856–868 (2000).
28. Sharma, C. M., Darfeuille, F., Plantinga, T. H. & Vogel, J. A small RNA regulates multiple ABC transporter mRNAs by targeting C/A-rich elements inside and upstream of ribosome-binding sites. *Genes Dev* **21**, 2804–2817 (2007).
29. Pulvermacher, S. C., Stauffer, L. T. & Stauffer, G. V. Role of the sRNA GcvB in regulation of *cycA* in *Escherichia coli*. *Microbiology* **155**, 106–114 (2009).
30. Pulvermacher, S. C., Stauffer, L. T. & Stauffer, G. V. The small RNA GcvB regulates *sstT* mRNA expression in *Escherichia coli*. *J Bacteriol* **191**, 238–248 (2009).

31. Sharma, C. M. *et al.* Pervasive post-transcriptional control of genes involved in amino acid metabolism by the Hfq-dependent GcvB small RNA. *Mol Microbiol* **81**, 1144–1165 (2011).
32. Jorgensen, M. G. *et al.* Small regulatory RNAs control the multi-cellular adhesive lifestyle of *Escherichia coli*. *Mol Microbiol* **84**, 36–50 (2012).
33. Urban, J. H., Papenfort, K., Thomsen, J., Schmitz, R. A. & Vogel, J. A conserved small RNA promotes discoordinate expression of the *glmUS* operon mRNA to activate *GlmS* synthesis. *J Mol Biol* **373**, 521–528 (2007).
34. Urban, J. H. & Vogel, J. Two seemingly homologous noncoding RNAs act hierarchically to activate *glmS* mRNA translation. *PLoS Biol* **6**, e64 (2008).
35. Reichenbach, B., Maes, A., Kalamorz, F., Hajnsdorf, E. & Gorke, B. The small RNA *GlmY* acts upstream of the sRNA *GlmZ* in the activation of *glmS* expression and is subject to regulation by polyadenylation in *Escherichia coli*. *Nucleic Acids Res* **36**, 2570–2580 (2008).
36. Göpel, Y., Papenfort, K., Reichenbach, B., Vogel, J. & Görke, B. Targeted decay of a regulatory small RNA by an adaptor protein for RNase E and counteraction by an anti-adaptor RNA. *Genes Dev.* **27**, 552–564 (2013).
37. Kalamorz, F., Reichenbach, B., Marz, W., Rak, B. & Gorke, B. Feedback control of glucosamine-6-phosphate synthase *GlmS* expression depends on the small RNA *GlmZ* and involves the novel protein *YhbJ* in *Escherichia coli*. *Mol Microbiol* **65**, 1518–1533 (2007).
38. Zhang, A. *et al.* Global analysis of small RNA and mRNA targets of Hfq. *Mol Microbiol* **50**, 1111–1124 (2003).
39. Mandin, P. & Gottesman, S. Integrating anaerobic/aerobic sensing and the general stress response through the *ArcZ* small RNA. *EMBO J.* **29**, 3094–107 (2010).
40. Thomason, M. K., Fontaine, F., De Lay, N. & Storz, G. A small RNA that regulates motility and biofilm formation in response to changes in nutrient availability in *Escherichia coli*. *Mol Microbiol* **84**, 17–35 (2012).
41. Hemm, M. R. *et al.* Small stress response proteins in *Escherichia coli*: proteins missed by classical proteomic studies. *J Bacteriol* **192**, 46–58 (2010).
42. Vogel, J., Argaman, L., Wagner, E. G. & Altuvia, S. The small RNA *IstR* inhibits synthesis of an SOS-induced toxic peptide. *Curr Biol* **14**, 2271–2276 (2004).
43. Darfeuille, F., Unoson, C., Vogel, J. & Wagner, E. G. An antisense RNA inhibits translation by competing with standby ribosomes. *Mol Cell* **26**, 381–392 (2007).
44. Moon, K. & Gottesman, S. A *PhoQ/P*-regulated small RNA regulates sensitivity of *Escherichia coli* to antimicrobial peptides. *Mol Microbiol* **74**, 1314–1330 (2009).
45. Udekwi, K. I. *et al.* Hfq-dependent regulation of *OmpA* synthesis is mediated by an antisense RNA. *Genes Dev* **19**, 2355–2366 (2005).
46. Rasmussen, A. A. *et al.* Regulation of *ompA* mRNA stability: the role of a small regulatory RNA in growth phase-dependent control. *Mol Microbiol* **58**, 1421–1429 (2005).

47. Coornaert, A. *et al.* MicA sRNA links the PhoP regulon to cell envelope stress. *Mol Microbiol* **76**, 467–479 (2010).
48. Chen, S., Zhang, A., Blyn, L. B. & Storz, G. MicC, a second small-RNA regulator of Omp protein expression in *Escherichia coli*. *J Bacteriol* **186**, 6689–6697 (2004).
49. Andersen, J. *et al.* The isolation and characterization of RNA coded by the micF gene in *Escherichia coli*. *Nucleic Acids Res* **15**, 2089–2101 (1987).
50. Andersen, J. & Delihias, N. micF RNA binds to the 5' end of ompF mRNA and to a protein from *Escherichia coli*. *Biochemistry* **29**, 9249–9256 (1990).
51. Coyer, J., Andersen, J., Forst, S. A., Inouye, M. & Delihias, N. micF RNA in ompB mutants of *Escherichia coli*: different pathways regulate micF RNA levels in response to osmolarity and temperature change. *J Bacteriol* **172**, 4143–4150 (1990).
52. Holmqvist, E., Unoson, C., Reimegard, J. & Wagner, E. G. A mixed double negative feedback loop between the sRNA MicF and the global regulator Lrp. *Mol Microbiol* **84**, 414–427 (2012).
53. Mandin, P. & Gottesman, S. A genetic approach for finding small RNAs regulators of genes of interest identifies RybC as regulating the DpiA/DpiB two-component system. *Mol Microbiol* **72**, 551–565 (2009).
54. Rasmussen, A. A. *et al.* A conserved small RNA promotes silencing of the outer membrane protein YbfM. *Mol Microbiol* **72**, 566–577 (2009).
55. Figueroa-Bossi, N., Valentini, M., Malleret, L., Fiorini, F. & Bossi, L. Caught at its own game: regulatory small RNA inactivated by an inducible transcript mimicking its target. *Genes Dev* **23**, 2004–2015 (2009).
56. Overgaard, M., Johansen, J., Moller-Jensen, J. & Valentin-Hansen, P. Switching off small RNA regulation with trap-mRNA. *Mol Microbiol* **73**, 790–800 (2009).
57. Kawano, M., Reynolds, A. A., Miranda-Rios, J. & Storz, G. Detection of 5'- and 3'-UTR-derived small RNAs and cis-encoded antisense RNAs in *Escherichia coli*. *Nucleic Acids Res* **33**, 1040–1050 (2005).
58. Fozo, E. M., Hemm, M. R. & Storz, G. Small toxic proteins and the antisense RNAs that repress them. *Microbiol Mol Biol Rev* **72**, 579–89, Table of Contents (2008).
59. Guillier, M. & Gottesman, S. Remodelling of the *Escherichia coli* outer membrane by two small regulatory RNAs. *Mol Microbiol* **59**, 231–247 (2006).
60. Guillier, M. & Gottesman, S. The 5' end of two redundant sRNAs is involved in the regulation of multiple targets, including their own regulator. *Nucleic Acids Res* **36**, 6781–6794 (2008).
61. Holmqvist, E. *et al.* Two antisense RNAs target the transcriptional regulator CsgD to inhibit curli synthesis. *EMBO J* **29**, 1840–1850 (2010).
62. De Lay, N. & Gottesman, S. A complex network of small non-coding RNAs regulate motility in *Escherichia coli*. *Mol. Microbiol.* **86**, 524–38 (2012).

63. Altuvia, S., Weinstein-Fischer, D., Zhang, A., Postow, L. & Storz, G. A small, stable RNA induced by oxidative stress: role as a pleiotropic regulator and antimutator. *Cell* **90**, 43–53 (1997).
64. Altuvia, S., Zhang, A., Argaman, L., Tiwari, A. & Storz, G. The Escherichia coli OxyS regulatory RNA represses fhIA translation by blocking ribosome binding. *EMBO J* **17**, 6069–6075 (1998).
65. Kawano, M., Oshima, T., Kasai, H. & Mori, H. Molecular characterization of long direct repeat (LDR) sequences expressing a stable mRNA encoding for a 35-amino-acid cell-killing peptide and a cis-encoded small antisense RNA in Escherichia coli. *Mol Microbiol* **45**, 333–349 (2002).
66. Kole, R. & Altman, S. Properties of purified ribonuclease P from Escherichia coli. *Biochemistry* **20**, 1902–1906 (1981).
67. Reed, R. E., Baer, M. F., Guerrier-Takada, C., Donis-Keller, H. & Altman, S. Nucleotide sequence of the gene encoding the RNA subunit (M1 RNA) of ribonuclease P from Escherichia coli. *Cell* **30**, 627–636 (1982).
68. Kim, S. & Lee, Y. Function of the repeated sequence in the 3' flanking region of the Escherichia coli rnpB gene on transcription termination and RNA processing. *FEBS Lett* **407**, 353–356 (1997).
69. Majdalani, N., Chen, S., Murrow, J., St John, K. & Gottesman, S. Regulation of RpoS by a novel small RNA: the characterization of RprA. *Mol Microbiol* **39**, 1382–1394 (2001).
70. Majdalani, N., Hernandez, D. & Gottesman, S. Regulation and mode of action of the second small RNA activator of RpoS translation, RprA. *Mol Microbiol* **46**, 813–826 (2002).
71. Mika, F. *et al.* Targeting of csgD by the small regulatory RNA RprA links stationary phase, biofilm formation and cell envelope stress in Escherichia coli. *Mol Microbiol* **84**, 51–65 (2012).
72. Douchin, V., Bohn, C. & Boulloc, P. Down-regulation of porins by a small RNA bypasses the essentiality of the regulated intramembrane proteolysis protease RseP in Escherichia coli. *J Biol Chem* **281**, 12253–12259 (2006).
73. Bosl, M. & Kersten, H. A novel RNA product of the tyrT operon of Escherichia coli. *Nucleic Acids Res* **19**, 5863–5870 (1991).
74. Waters, L. S., Sandoval, M. & Storz, G. The Escherichia coli MntR miniregulon includes genes encoding a small protein and an efflux pump required for manganese homeostasis. *J Bacteriol* **193**, 5887–5897 (2011).
75. Gerstle, K., Klatschke, K., Hahn, U. & Piganeau, N. The small RNA RybA regulates key-genes in the biosynthesis of aromatic amino acids under peroxide stress in E. coli. *RNA Biol* **9**, 458–468 (2012).
76. Johansen, J., Rasmussen, A. A., Overgaard, M. & Valentin-Hansen, P. Conserved small non-coding RNAs that belong to the sigmaE regulon: role in down-regulation of outer membrane proteins. *J Mol Biol* **364**, 1–8 (2006).
77. Thompson, K. M., Rhodius, V. A. & Gottesman, S. SigmaE regulates and is regulated by a small RNA in Escherichia coli. *J Bacteriol* **189**, 4243–4256 (2007).



78. Antal, M., Bordeau, V., Douchin, V. & Felden, B. A small bacterial RNA regulates a putative ABC transporter. *J Biol Chem* **280**, 7901–7908 (2005).
79. Frohlich, K. S., Papenfort, K., Berger, A. A. & Vogel, J. A conserved RpoS-dependent small RNA controls the synthesis of major porin OmpD. *Nucleic Acids Res* **40**, 3623–3640 (2012).
80. Masse, E. & Gottesman, S. A small RNA regulates the expression of genes involved in iron metabolism in *Escherichia coli*. *Proc Natl Acad Sci U S A* **99**, 4620–4625 (2002).
81. Masse, E., Vanderpool, C. K. & Gottesman, S. Effect of RyhB small RNA on global iron use in *Escherichia coli*. *J Bacteriol* **187**, 6962–6971 (2005).
82. Prevost, K. *et al.* The small RNA RyhB activates the translation of shiA mRNA encoding a permease of shikimate, a compound involved in siderophore synthesis. *Mol Microbiol* **64**, 1260–1273 (2007).
83. Salvail, H. *et al.* A small RNA promotes siderophore production through transcriptional and metabolic remodeling. *Proc Natl Acad Sci U S A* **107**, 15223–15228 (2010).
84. Vanderpool, C. K. & Gottesman, S. Involvement of a novel transcriptional activator and small RNA in post-transcriptional regulation of the glucose phosphoenolpyruvate phosphotransferase system. *Mol Microbiol* **54**, 1076–1089 (2004).
85. Wadler, C. S. & Vanderpool, C. K. A dual function for a bacterial small RNA: SgrS performs base pairing-dependent regulation and encodes a functional polypeptide. *Proc Natl Acad Sci U S A* **104**, 20454–20459 (2007).
86. Rice, J. B. & Vanderpool, C. K. The small RNA SgrS controls sugar-phosphate accumulation by regulating multiple PTS genes. *Nucleic Acids Res* **39**, 3806–3819 (2011).
87. Pedersen, K. & Gerdes, K. Multiple hok genes on the chromosome of *Escherichia coli*. *Mol Microbiol* **32**, 1090–1102 (1999).
88. Rice, P. W., Polayes, D. A. & Dahlberg, J. E. Spot 42 RNA of *Escherichia coli* is not an mRNA. *J Bacteriol* **169**, 3850–3852 (1987).
89. Moller, T., Franch, T., Udesen, C., Gerdes, K. & Valentin-Hansen, P. Spot 42 RNA mediates discoordinate expression of the *E. coli* galactose operon. *Genes Dev* **16**, 1696–1706 (2002).
90. Beisel, C. L. & Storz, G. The base-pairing RNA spot 42 participates in a multioutput feedforward loop to help enact catabolite repression in *Escherichia coli*. *Mol Cell* **41**, 286–297 (2011).
91. Vogel, J. *et al.* RNomics in *Escherichia coli* detects new sRNA species and indicates parallel transcriptional output in bacteria. *Nucleic Acids Res* **31**, 6435–6443 (2003).
92. Hobbs, E. C., Astarita, J. L. & Storz, G. Small RNAs and small proteins involved in resistance to cell envelope stress and acid shock in *Escherichia coli*: analysis of a bar-coded mutant collection. *J Bacteriol* **192**, 59–67 (2010).
93. Muto, A. *et al.* Structure and function of 10Sa RNA: trans-translation system. *Biochimie* **78**, 985–991 (1996).

94. Wassarman, K. M. & Storz, G. 6S RNA regulates E. coli RNA polymerase activity. *Cell* **101**, 613–623 (2000).
95. Kawano, M., Aravind, L. & Storz, G. An antisense RNA controls synthesis of an SOS-induced toxin evolved from an antitoxin. *Mol Microbiol* **64**, 738–754 (2007).
96. Wassarman, K. M. & Saecker, R. M. Synthesis-mediated release of a small RNA inhibitor of RNA polymerase. *Science*. **314**, 1601–1603 (2006).
97. Raghavan, R., Groisman, E. A. & Ochman, H. Genome-wide detection of novel regulatory RNAs in E. coli. *Genome Res* **21**, 1487–1497 (2011).
98. Chiang, M. K., Lu, M. C., Liu, L. C., Lin, C. T. & Lai, Y. C. Impact of Hfq on global gene expression and virulence in *Klebsiella pneumoniae*. *PLoS One* **6**, e22248 (2011).
99. Sittka, A. *et al.* Deep sequencing analysis of small noncoding RNA and mRNA targets of the global post-transcriptional regulator, Hfq. *PLoS Genet* **4**, e1000163 (2008).
